# Supplementary material for: Qualitative cross-sectional study of the perceived causes of depression in South Asian origin women in Toronto
Source: PubMed Central journal article supplement — BMJ Open. 2012 Feb 15;2(1):e000641. doi: 10.1136/bmjopen-2011-000641 (PMC3282289; doi:10.1136/bmjopen-2011-000641), 2012-02-15
Supplement: bmjopen-2011-000641.draft_revisions.pdf [file bmjopen-2011-000641.draft_revisions.pdf]

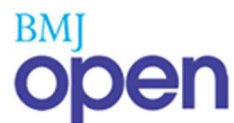

**Qualitative study of the perceived causes of depression in South Asian origin women in Toronto**

|                                 |                                                                                                                                                                                                                  |
|---------------------------------|------------------------------------------------------------------------------------------------------------------------------------------------------------------------------------------------------------------|
| Journal:                        | <i>BMJ Open</i>                                                                                                                                                                                                  |
| Manuscript ID:                  | bmjopen-2011-000641                                                                                                                                                                                              |
| Article Type:                   | Research                                                                                                                                                                                                         |
| Date Submitted by the Author:   | 17-Nov-2011                                                                                                                                                                                                      |
| Complete List of Authors:       | ekanyake, samanthika; CAMH, Health services and health equity<br>ahmed, farah; york university<br>McKenzie, Kwame; centre for addiction and mental health and university of<br>toronto, social equity and health |
| <b>Primary Subject Heading</b>: | Mental health                                                                                                                                                                                                    |
| Secondary Subject Heading:      | Health services research, Mental health, Patient-centred medicine,<br>Qualitative research                                                                                                                       |
| Keywords:                       | south asian, women, depression, aetiology, ethnicity                                                                                                                                                             |
|                                 |                                                                                                                                                                                                                  |

SCHOLARONE™  
Manuscripts

Peer Review Only

STROBE Statement—Checklist of items that should be included in reports of *cross-sectional studies*

|                              | Item No | Recommendation                                                                                                                                                                                                                                                                                                                                       |
|------------------------------|---------|------------------------------------------------------------------------------------------------------------------------------------------------------------------------------------------------------------------------------------------------------------------------------------------------------------------------------------------------------|
| <b>Title and abstract</b>    | 1       | (a) Indicate the study's design with a commonly used term in the title or the abstract<br>(b) Provide in the abstract an informative and balanced summary of what was done and what was found done PAGE 2                                                                                                                                            |
| <b>Introduction</b>          |         |                                                                                                                                                                                                                                                                                                                                                      |
| Background/rationale         | 2       | Explain the scientific background and rationale for the investigation being reported<br>Pages 5-7                                                                                                                                                                                                                                                    |
| Objectives                   | 3       | State specific objectives, including any prespecified hypotheses pages 6/7                                                                                                                                                                                                                                                                           |
| <b>Methods</b>               |         |                                                                                                                                                                                                                                                                                                                                                      |
| Study design                 | 4       | Present key elements of study design early in the paper page<br>Page 7                                                                                                                                                                                                                                                                               |
| Setting                      | 5       | Describe the setting, locations, and relevant dates, including periods of recruitment, exposure, follow-up, and data collection<br>Page 7                                                                                                                                                                                                            |
| Participants                 | 6       | (a) Give the eligibility criteria, and the sources and methods of selection of participants<br>(b) Page 8                                                                                                                                                                                                                                            |
| Variables                    | 7       | Clearly define all outcomes, exposures, predictors, potential confounders, and effect modifiers. Give diagnostic criteria, if applicable<br><br>Not applicable                                                                                                                                                                                       |
| Data sources/<br>measurement | 8*      | For each variable of interest, give sources of data and details of methods of assessment (measurement). Describe comparability of assessment methods if there is more than one group<br>Page 8                                                                                                                                                       |
| Bias                         | 9       | Describe any efforts to address potential sources of bias<br>Page 9                                                                                                                                                                                                                                                                                  |
| Study size                   | 10      | Explain how the study size was arrived at<br>Page 9                                                                                                                                                                                                                                                                                                  |
| Quantitative variables       | 11      | Explain how quantitative variables were handled in the analyses. If applicable, describe which groupings were chosen and why                                                                                                                                                                                                                         |
| Statistical methods          | 12      | (a) Describe all statistical methods, including those used to control for confounding<br>Page 9<br>(b) Describe any methods used to examine subgroups and interactions<br>(c) Explain how missing data were addressed<br>(d) If applicable, describe analytical methods taking account of sampling strategy<br>(e) Describe any sensitivity analyses |
| <b>Results</b>               |         |                                                                                                                                                                                                                                                                                                                                                      |
| Participants                 | 13*     | (a) Report numbers of individuals at each stage of study—eg numbers potentially eligible, examined for eligibility, confirmed eligible, included in the study, completing                                                                                                                                                                            |

|                          |     |                                                                                                                                                                                                                                                                                                                                                                                                                                    |
|--------------------------|-----|------------------------------------------------------------------------------------------------------------------------------------------------------------------------------------------------------------------------------------------------------------------------------------------------------------------------------------------------------------------------------------------------------------------------------------|
|                          |     | follow-up, and analysed page 7 and 9 and 10                                                                                                                                                                                                                                                                                                                                                                                        |
|                          |     | (b) Give reasons for non-participation at each stage                                                                                                                                                                                                                                                                                                                                                                               |
|                          |     | (c) Consider use of a flow diagram                                                                                                                                                                                                                                                                                                                                                                                                 |
| Descriptive data         | 14* | (a) Give characteristics of study participants (eg demographic, clinical, social) and information on exposures and potential confounders<br>Page 9/10                                                                                                                                                                                                                                                                              |
|                          |     | (b) Indicate number of participants with missing data for each variable of interest                                                                                                                                                                                                                                                                                                                                                |
| Outcome data             | 15* | Report numbers of outcome events or summary measures                                                                                                                                                                                                                                                                                                                                                                               |
| Main results             | 16  | Qualitative study<br>(a) Give unadjusted estimates and, if applicable, confounder-adjusted estimates and their precision (eg, 95% confidence interval). Make clear which confounders were adjusted for and why they were included<br>(b) Report category boundaries when continuous variables were categorized<br>(c) If relevant, consider translating estimates of relative risk into absolute risk for a meaningful time period |
| Other analyses           | 17  | Report other analyses done—eg analyses of subgroups and interactions, and sensitivity analyses                                                                                                                                                                                                                                                                                                                                     |
| <b>Discussion</b>        |     |                                                                                                                                                                                                                                                                                                                                                                                                                                    |
| Key results              | 18  | Summarise key results with reference to study objectives<br>page 18/19                                                                                                                                                                                                                                                                                                                                                             |
| Limitations              | 19  | Discuss limitations of the study, taking into account sources of potential bias or imprecision. Discuss both direction and magnitude of any potential bias<br>page 20                                                                                                                                                                                                                                                              |
| Interpretation           | 20  | Give a cautious overall interpretation of results considering objectives, limitations, multiplicity of analyses, results from similar studies, and other relevant evidence<br>Page 21                                                                                                                                                                                                                                              |
| Generalisability         | 21  | Discuss the generalisability (external validity) of the study results                                                                                                                                                                                                                                                                                                                                                              |
| <b>Other information</b> |     |                                                                                                                                                                                                                                                                                                                                                                                                                                    |
| Funding                  | 22  | Give the source of funding and the role of the funders for the present study and, if applicable, for the original study on which the present article is based<br>Page 4                                                                                                                                                                                                                                                            |

\*Give information separately for exposed and unexposed groups.

**Note:** An Explanation and Elaboration article discusses each checklist item and gives methodological background and published examples of transparent reporting. The STROBE checklist is best used in conjunction with this article (freely available on the Web sites of PLoS Medicine at <http://www.plosmedicine.org/>, Annals of Internal Medicine at <http://www.annals.org/>, and Epidemiology at <http://www.epidem.com/>). Information on the STROBE Initiative is available at [www.strobe-statement.org](http://www.strobe-statement.org).

1  
2  
3  
4  
5 **Qualitative cross sectional study of the perceived causes of**  
6 **depression in South Asian origin women in Toronto**  
7  
8  
9

10  
11  
12 Samantha Ekanayake, PhD<sup>1</sup>,  
13 Farah Ahmad, PhD<sup>2</sup> and  
14 Kwame McKenzie, MD<sup>3\*</sup>  
15  
16  
17  
18  
19

20  
21 \*Corresponding Author

22 Kwame McKenzie.

23  
24 <sup>3</sup>Director, Social Aetiology of Mental Illness (SAMI) Training Program, Health Systems  
25 and Health Equity Research Group, Centre for Addiction and Mental Health (CAMH),  
26  
27

28 455 Spadina Avenue, Suite 300

29 Toronto, ON. Canada. M5S 2G8

30 Phone: 416 535 8501 Ext 7636

31 Email: Kwame\_McKenzie@camh.net  
32  
33  
34  
35  
36  
37

38 Affiliations

39  
40 <sup>1</sup> Post Doctoral Research Fellow, Social Aetiology of Mental Illness (SAMI) Training  
41 Program, Health Systems and Health Equity Research Group, Centre for Addiction and  
42 Mental Health (CAMH)  
43  
44

45 <sup>2</sup> Assistant Professor, School of Health Policy and Management, Faculty of Health, York  
46 University  
47  
48  
49  
50  
51  
52  
53  
54  
55  
56  
57  
58  
59  
60

1  
2  
3  
4  
5  
6  
7  
8  
9  
10  
11  
12  
13  
14  
15  
16  
17  
18  
19  
20  
21  
22  
23  
24  
25  
26  
27  
28  
29  
30  
31  
32  
33  
34  
35  
36  
37  
38  
39  
40  
41  
42  
43  
44  
45  
46  
47  
48  
49  
50  
51  
52  
53  
54  
55  
56  
57  
58  
59  
60

For peer review only

1  
2  
3  
4  
5 **Objective:** To explore how South Asian origin women in Toronto, Canada, understand  
6 and explain the causes of their depression.  
7

8 **Design:** Cross sectional in depth qualitative interviews  
9

10 **Setting:** Outpatient service in Toronto, Ontario  
11

12 **Participants:** Ten women with symptoms of depression aged between 22-65 years of  
13 age. 7 were in India, 2 Sri-Lanka and 1 in Pakistan. 4 were Muslim, 3 Hindu and 3  
14 Catholic. Two participants had university degrees, one had a high school diploma and all  
15 the other participants (7) had completed less than a high school education. 8 were  
16 married, 1 was unmarried and 1 a widow.  
17

18 **Primary outcome:** Causes of depression as presented in thematic content analysis with  
19 some elements of grounded theory of in depth interviews.  
20

21 **Results:** Three main factors emerged from the participant narratives as the causes of  
22 depression: family and relationships; culture and migration; and, socio-economic. The  
23 majority of the participants identified domestic abuse, marital problems and interpersonal  
24 problems in the family as the cause of their depression with culture and migration and  
25 socio-economic factors being contributory. None of our study participants reported  
26 spiritual, supernatural, or religious factors as causes of depression.  
27

28 **Conclusion:** A “personal-social-cultural” model emerged as the aetiological paradigm  
29 for depression. Given the perceived causation psycho-social treatment methods may be  
30 more acceptable for South Asian origin women.  
31  
32  
33  
34  
35  
36  
37  
38  
39  
40  
41  
42  
43  
44  
45  
46  
47  
48  
49  
50  
51  
52  
53  
54  
55  
56  
57  
58  
59  
60

**Article focus**

An exploration of the perceived causes of depression in women of South Asian origin in Toronto, Canada.

**Key messages**

Depression in South Asian women in Toronto may be caused by social problems that could be the target for prevention and health promotion.

Given the perceived causation, psycho-social interventions may be more acceptable for South Asian origin women in Toronto.

Links between social and health services may be important in decreasing the burden of depression in South Asian origin women in Toronto.

**Strengths**

This study was able to interview a diverse cross section of South Asian origin women in a community setting.

The interviewer was also a South Asian women and this may have facilitated disclosure.

**Weaknesses:**

The study did not disaggregate the South Asian group into different religious groups or countries of origin.

**Key Words:** South Asian women, causes of depression, qualitative, illness models

**Funding Support and Acknowledgements**

This research was supported by a strategic training grant (grant number TUF 96115) from the Canadian Institutes of Health Research (CIHR) provided for the Social Aetiology of Mental Illness (SAMI) Training Program. The authors would like to thank “Across Boundaries” a community based mental health centre, for their support during data collection.

**All authors were involved in developing the concept, methodology, data analysis and drafting and editing the paper.**

**None of the authors has a conflict of interest.**

## Introduction

The way that people understand and explain illness depends on many factors including cultural background, education level, health beliefs, attitudes and knowledge and trust in health care systems.<sup>1-3</sup>

Illness explanatory models (IEM) examine the perspectives people have of illness; mainly focusing on aetiology, symptoms, severity, prognosis, reasons for consultation, and treatment preferences<sup>4</sup>. Research suggest that IEM ultimately determine a number of factors including help-seeking behaviour, treatment compliance, satisfaction, selection of pathways to care and selection of treatment<sup>5,6</sup>. IEM may vary between and within ethnic groups, gender groups, and different generations as well as for different types of illness<sup>7-9</sup>

A better understanding of conceptual models of illness may help to improve service delivery and clinical outcomes and reduce health care cost<sup>10</sup>.

Depression is one of the most under-recognized and under-treated mental illnesses in primary care globally<sup>11</sup>. It is one of the most common and costly mental health problems in Canada<sup>12, 13</sup>.

The rates of depression in immigrants in Canada varies; some groups such as older adults and some South and East Asian groups may be at increased risk<sup>16</sup>. Though the use of general medical care is similar for immigrants and non-immigrants but immigrants are less likely to use mental health services<sup>14,15</sup>. The reasons for the increased rates of



1  
2  
3  
4  
5 depression have not been well documented in Canada but with regards to service use  
6  
7 studies report that ‘bio-medical’ models of health systems may act as barriers to care  
8  
9 conflicting with the views of patients from other traditions<sup>17, 18</sup>.

10  
11  
12  
13  
14 Theoretical models of the aetiology of depression are diverse<sup>19</sup>. Bio-medical models  
15  
16 consist of genetic, physical, or somatic causation. Socio-cultural models include life  
17  
18 circumstances and cultural factors, while psychological models focus on psychological or  
19  
20 behavioural factors. A multiple causation, ‘bio-psycho-social’, model has been widely  
21  
22 accepted<sup>20, 21, 22</sup>.

23  
24  
25  
26 The lay understanding of depression varies between cultural and ethnic groups. For  
27  
28 instance in European countries the majority of patients endorse ‘bio-psychiatric’ models,  
29  
30 while in East and South East Asia psycho-social models predominate.<sup>23</sup> This may be  
31  
32 linked to differences in help seeking as the former prefer psychiatric treatment<sup>8</sup> while  
33  
34 latter prefer traditional healing, rituals, or faith healings<sup>16</sup>.

35  
36  
37  
38  
39  
40 Among the few Canadian studies that are focused on conceptual understandings of  
41  
42 depression, Schreiber and Hatrick<sup>24</sup>, reported that Euro-North American women  
43  
44 predominantly report a ‘bio-medical’ explanatory models. But, to our knowledge, there  
45  
46 are no studies conducted in Canada that have investigated the conceptual models of  
47  
48 depression in minority ethnic groups. In order to begin to fill this gap in the literature, we  
49  
50 conducted a qualitative study of women of South Asian origin. The aim of the study was  
51  
52  
53  
54  
55  
56  
57  
58  
59  
60

1  
2  
3  
4  
5 to identify and document how South Asian origin women in Toronto, Canada, understand  
6  
7 and explain the causes of their depression.  
8

9  
10 The South Asian population is the largest visible minority in Canada<sup>25</sup>. 'South Asian'  
11  
12 refers to people who originate from India, Sri Lanka, Bangladesh, Pakistan, and Nepal.  
13  
14 They are a diverse group with significant ethnic, religious, and linguistic differences; but  
15  
16 it has been argued that these groups share commonalities in their social networks, family  
17  
18 interactions, and customs and traditions<sup>26, 16</sup>. This study investigated only one gender  
19  
20 groups because conceptual models of depression vary by gender<sup>9</sup>. Women were chosen  
21  
22 because the prevalence and incidence of depression is higher in this group<sup>27, 28</sup>. Exposure  
23  
24 to risk factors may vary by gender group<sup>29</sup>.  
25  
26  
27  
28  
29  
30

### 31 **Method**

32  
33 In depth individual interviews using qualitative analysis was used.  
34  
35  
36  
37

38 The sample included women over 18 years old, who were born in South Asia or whose  
39  
40 parents were born in South Asia. 'South Asia' followed the Statistics Canada definition  
41  
42 of India, Sri Lanka, Bangladesh, Pakistan, and Nepal. Recruitment was from a  
43  
44 community based mental health agency which provides services to racialised  
45  
46 communities in Toronto, Ontario in 2010. Community workers referred participants to  
47  
48 the study or participants answered an advertisement placed in the community agency.  
49  
50  
51  
52  
53  
54  
55  
56  
57  
58  
59  
60

1  
2  
3  
4  
5 Those who were unable to read and speak in English were not included in this pilot study  
6  
7 as there was no funding for interpreters. In order to increase the heterogeneity of the  
8  
9 sample, we purposively recruited participants who had migrated from different countries,  
10  
11 had differing marital status and belonged to different religious groups.  
12  
13

14  
15  
16 Depression was confirmed using GHQ 12 questionnaire. Those who scored more than 12  
17  
18 points (on a Likert scale) were invited for interview. Participants were provided with an  
19  
20 environment to speak freely and openly about their experiences. The aim was to get a rich  
21  
22 description of the perceived causes of depression from the perspective of the respondents.  
23  
24  
25

26  
27  
28 Interviews were conducted by the first author (SE) and lasted 45-60 minutes. A topic  
29  
30 guide was used to direct the flow of the interviews. The structure of the interview was as  
31  
32 follows: participants were first asked to explain their personal, family and household  
33  
34 circumstances. Then they were invited to talk about their health, their understanding of  
35  
36 causes of their depression, their daily lifestyles, employment, the nature of any social and  
37  
38 economic difficulties, and any social problems they faced. Finally, the participants were  
39  
40 asked to comment on how they believe that those circumstances related to their mental  
41  
42 health status. Interviews were taped and transcribed. All the transcripts were anonymized.  
43  
44  
45  
46  
47  
48

49  
50 Ethics approval was obtained from the Research Ethics Board of the Centre for Addiction  
51  
52 and Mental Health in Toronto, Ontario prior to the recruitment. An informed consent was  
53  
54 obtained prior each of the interview.  
55  
56  
57  
58  
59  
60

1  
2  
3  
4  
5  
6  
7 Thematic content analysis with some elements of grounded theory<sup>30</sup> was used to analyse  
8 the data. Data collection, coding and analysis were inter-related processes. The analyses  
9 of interview transcripts was begun after the first interview. We used a modified version  
10 of interview transcripts was begun after the first interview. We used a modified version  
11 similar to the three step coding and analysis approach (open coding, axial coding and  
12 selective coding) introduced by the Strauss and Corbin<sup>30</sup>. Each transcript was read at least  
13 twice and core concepts were identified. Codes were assigned for the selected texts. This  
14 was further developed by adding sub-themes which were followed by the detailed coding.  
15 A preliminary coding scheme was developed after indentifying the major themes. The  
16 relationships and differences between codes were identified. Coding was done separately  
17 by each researcher (SE and KM), and then was discussed by the research team. The  
18 researchers cross-checked their coding structures and, in cases where mismatches  
19 occurred, we conducted detailed discussions to achieve consensus. NVivo<sub>9</sub> qualitative  
20 data analysis software<sup>31</sup> was used for the data analysis. Recruitment was stopped when no  
21 new themes were being identified fro the transcripts.  
22  
23  
24  
25  
26  
27  
28  
29  
30  
31  
32  
33  
34  
35  
36  
37  
38  
39  
40  
41  
42

## 43 **Results**

44 The sample:

45  
46  
47 Participants were aged between 22-65 years of age. Seven women were born in India,  
48 two in Sri Lanka and one in Pakistan. Four women were Muslim, three Hindu and three  
49 Catholic. Two participants had university degrees, one had a high school diploma and all  
50 the other participants (7) had completed less than a high school education. None of the  
51  
52  
53  
54  
55  
56  
57  
58  
59  
60

1  
2  
3  
4  
5 women were employed, and all were dependent on some form of income support from  
6  
7 the government such as Ontario Disability Support Program (ODSP), Employment  
8  
9 Insurance (EI), or the Old Age Security (OAS) program. Eight women were married, one  
10  
11 was unmarried and the other was a widow. Two of the women had some history of  
12  
13 mental illness other than depression.  
14  
15

### 16 17 18 19 **Causes of depression:**

20  
21 Three significant factors that cause depression were emerged from participant's  
22  
23 narratives:  
24

- 25  
26 1) individual, family and relationships;
- 27  
28 2) culture and migration; and,
- 29  
30 3) socio-economic factors.  
31  
32  
33  
34

35  
36 Participants endorsed a variety of combinations of these problems with some identifying  
37  
38 difficulties in all three as the cause of their depression. Table 1 presents a summary of  
39  
40 themes and sub-themes emerged from the narratives.  
41  
42  
43  
44

45 Table 1 about here:  
46  
47  
48

### 49 **1. Individual, family and relationship factors**

50  
51  
52  
53  
54  
55  
56  
57  
58  
59  
60

1  
2  
3  
4  
5 Individual, family and relationship factors were identified as the primary cause of  
6  
7 depression by the majority of the participants. Domestic abuse, infidelity, stress of  
8  
9 divorce or separation, and bereavement were the main stressors behind the depression.  
10  
11

### 12 13 14 *Abuse*

15  
16 All members of the study group experienced some form of domestic abuse such as  
17  
18 physical, social, psychological, verbal or economic abuses from their intimate partners.  
19  
20 Prolonged traumatic and abusive experiences were viewed as the root cause of their  
21  
22 depression.  
23  
24  
25  
26  
27

28  
29 Financial or economic abuse was reported frequently by the participants. Many women  
30  
31 explained that they were forced to 'find jobs', 'work all seven days, or 'earned as much  
32  
33 as', even though they were not allowed to have their own bank accounts. Some of our  
34  
35 participants claimed that their husbands stole money from them, used their credit cards  
36  
37 without authorisation and some stated that they were forced to get bank loans.  
38  
39  
40  
41

42  
43 *ID 6: I had very stressful life..I worked in a factory.. I used to work all 7 days. ..On*  
44  
45 *Fridays my husband used to come to my work place. He took my cheque and asked me to*  
46  
47 *sign the back of it. He takes all the money & gives me \$20 per week for the bus pass.. I*  
48  
49 *felt desperate.. I had no money for anything...and he told to everybody that 'I have a*  
50  
51 *money maker at home'...*  
52  
53  
54  
55  
56  
57  
58  
59  
60

1  
2  
3  
4  
5 Restriction of personal contacts and demanding that women do not talk to other people in  
6  
7 the neighbourhood were also identified as a main stressor. When husbands abandoned  
8  
9 these women they were devastated as they were socially isolated and left with little or no  
10  
11 access to money. Lack of understanding of support systems, and fear of talking to  
12  
13 unknown people, together with language difficulties, led these women to remain silent.  
14  
15  
16

17  
18 Physical abuse, such as beating, slapping and hair pulling was mentioned by the majority  
19  
20 of the women in the study group. According to the participants, their children were also  
21  
22 victims of these incidents. The other forms of psychological or physical abuse, such as  
23  
24 'forcing to get out of the home', 'forcing to wear hijab', and 'name calling' also were  
25  
26 mentioned.  
27  
28  
29

30  
31  
32  
33 *ID 4: In India it's perfectly normal for your husband to beat you...you have no choice*  
34  
35 *other than just suffering.. When I came here, I thought it's normal too... and he hit me*  
36  
37 *very badly to my shoulders, even blood came and my children cried... neighbors also*  
38  
39 *heard...I had this experience for 17 years...*  
40  
41  
42

#### 43 44 **Health problems**

45  
46 The majority of the participant's had been affected by some form of physical health  
47  
48 problem. Narratives indicated that they felt overwhelmed by the stress of their poor  
49  
50 health status. There were some participants, who were suffering from prolonged multiple  
51  
52 illnesses such as diabetes, high blood pressure, fibromyalgia, and osteoporosis.  
53  
54  
55  
56  
57  
58  
59  
60

1  
2  
3  
4  
5  
6  
7 *ID 6: Sometime I still I feel that why all these things happened to me. My whole body is*  
8 *paining. I was very active in the past..... but now both hands are not good. I had an*  
9 *operation too. But still I can't even use my hand to eat food. Sometimes I keep plate on*  
10 *the table and eat like a dog....*  
11  
12  
13  
14  
15  
16  
17  
18

### 19 ***Bereavement***

20  
21 According to ID 8 (54 years old and a widow with no children), bereavement was the  
22  
23 main cause of her depression.  
24  
25  
26  
27

28 *"ID 8: He is a very good husband, he never leave me alone. Every time when I go to*  
29 *doctors appointment he comes with me.....Now some times I don't eat, don't drink and*  
30 *crying all the time... Even I can't sleep. I remember him always...I got all this condition*  
31 *when he passed away.. "*  
32  
33  
34  
35  
36  
37  
38  
39

40 Lack of extended family support, language difficulties that prevented her from attending  
41  
42 grief counseling, and an inability to develop supportive social networks in the  
43  
44 neighborhood made ID 8 more vulnerable to complicated grief reactions.  
45  
46  
47  
48

### 49 ***Sexual infidelity***

50  
51 The sexual infidelity of an intimate partner can be a devastating experience. Among the  
52  
53 seven divorced or separated women in our sample, four mentioned that they discovered  
54  
55  
56  
57  
58  
59  
60



1  
2  
3  
4  
5 that their husbands were having extra-marital relationships. They reported worry, sadness  
6  
7 and depression following this.  
8  
9

### 10 11 12 *Aging and isolation* 13

14 Some older aged participants commented that their married children were not keen on  
15  
16 caring for them, while others mentioned the burden of additional household chores such  
17  
18 as caring for their grandchildren. Feelings of emotional and physical isolation, fear of the  
19  
20 future because of their reliance on others and an inability to perform their own household  
21  
22 activities (due to poor physical and mental health) led them to feel hopelessness and  
23  
24 despair.  
25  
26  
27  
28  
29  
30

## 31 **2. Culture and migration** 32 33 34

### 35 *Stress of divorce and separation* 36

37  
38 With the exception of one participant aged 33 years, none of the divorced or separated  
39  
40 women were involved in secondary relationships. Thinking of a second marriage or  
41  
42 having romantic relationships still remains 'unsuitable' or 'out of culture' concepts  
43  
44 among the middle-aged and older women in this community. Results indicated that  
45  
46 knowing that their former spouses had remarried or were currently involved in some sort  
47  
48 of relationship brought these women more worry and jealousy.  
49  
50  
51  
52  
53  
54  
55  
56  
57  
58  
59  
60

1  
2  
3  
4  
5 Our samples claimed that traditionally in some SA cultures, divorce and separation are  
6  
7 not acceptable and women may be blamed for a breakdown of their marriage. Participants  
8  
9 painfully described the immense burden, stigma, and stress experienced once they were  
10  
11 divorced or separated from their spouses.  
12  
13

14  
15  
16  
17 *ID 4 “On the middle of the night he left me... I got a panic attack. I thought I am going to*  
18  
19 *die...I was scared... How will society think now.... What will happen to my children?*  
20  
21 *How will my parents and my people react to me when I go to India? What am I going to*  
22  
23 *tell them?...When he started to get papers sent by the lawyer he phoned me and told me I*  
24  
25 *am a characterless woman. That was first time I went to court, your family no body do*  
26  
27 *that...”*  
28  
29  
30  
31  
32

33 Participants also talked about the negative responses from their own family or other SA  
34  
35 community members about their decision to get a divorce. Some of the women were still  
36  
37 using their husbands’ surnames or lying about their actual family status, while others  
38  
39 dealt with the problem by cutting themselves off from other SA people.  
40  
41  
42  
43  
44

#### 45 ***Cultural distance***

46  
47 Results showed that cultural distance between parent and children was also stressful for  
48  
49 both groups. Those with strong SA values seemed to be more depressed and were not in a  
50  
51 position to accept their children’s out-of-culture marriages or pre-marital relationships.  
52  
53  
54  
55  
56  
57  
58  
59  
60

1  
2  
3  
4  
5 They further believed that they did not have power or authority to influence their  
6  
7 children.  
8  
9

10  
11 *ID 3: “My son went out my culture and married. He married a Spanish girl. She doesn’t*  
12 *want me to be in his life. Although I try hard to tell him she was not really kind of people*  
13 *we need...he didn’t listen to me. ...now he is suffering. One day this woman asked me to*  
14 *make a beef soup. I don’t eat or even touch beef.. I really keep rules that I was taught to*  
15 *live.”.*  
16  
17  
18  
19  
20  
21  
22

23  
24 In contrast, younger participants claimed they were suffering because of the strict rules of  
25 their parents. They identified themselves as being caught between traditional and modern.  
26  
27 Some of our participants believed that they were brought up in more restrictive family  
28 environments than other Canadian girls in their age groups. Some said they had been  
29 asked to ‘quit schools’ or ‘choose jobs suits to girls’ or ‘get marry through arranged  
30 marriages’. Narratives further indicated that younger SA women were having more  
31 difficulties in negotiating their needs and expectations with their parents.  
32  
33  
34  
35  
36  
37  
38  
39  
40  
41  
42

### 43 ***Stigma***

44  
45 The cultural stigma of being labeled as a mentally ill person was also a continuous stress  
46 factor. ID 2 revealed her observation about the SA communities and explained that some  
47 people believe that a person with a mental illness is ‘an out of their control person’ or  
48  
49 ‘should be look down upon’ or they should be ‘scared to talk’ with them.  
50  
51  
52  
53  
54  
55  
56  
57  
58  
59  
60

1  
2  
3  
4  
5 *ID 2: My dad is saying that since you are mental, you should get married. And I said*  
6  
7 *why? He said then your husband makes you happy....But if someone knows that I am a*  
8  
9 *mentally ill, then they don't marry me. In our society there is a big label on mental*  
10  
11 *illness..*

### ***Difficulties in new country***

12  
13  
14  
15  
16  
17  
18  
19 Migration related stress was also identified as a reason for depression. Migration is a  
20  
21 transformation in immigrant's lives and it is associated with high hopes. Lack of  
22  
23 understanding of the Canadian system, especially limited knowledge concerning the  
24  
25 existing resources and language difficulties, made their lives more difficult and stressful.  
26  
27  
28  
29

### **Socio-economic factors**

#### ***Economic difficulties***

30  
31  
32  
33  
34  
35  
36  
37 Almost all of the participants were living on form of government income support.  
38  
39  
40 Participants acknowledged that depression was often linked to financial difficulties,  
41  
42 especially when there is insufficient income support or loss of employment.  
43  
44  
45  
46

#### ***Discrimination and racism***

47  
48  
49  
50 Subjective experiences with unfair treatment, racist acts, or acts of hatred from other  
51  
52 Canadians, were also identified as a cause of depression and powerlessness. Poorer  
53  
54 access to 'high standard jobs' and differential treatment in health services and other  
55  
56  
57  
58  
59  
60

1  
2  
3  
4  
5 service provision agencies were also highlighted. Participants openly talked about the  
6  
7 challenges they faced in Canada such as loss of cultural identity and loss of social pride.  
8  
9  
10 Many Muslim women acknowledged that wearing of a 'hijab' caused some problems,  
11  
12 especially after the 9/11 US attack. Participants also mentioned that immediate  
13  
14 supervisors of other cultural backgrounds believed that people of 'SA identity' were  
15  
16 inferior.  
17  
18  
19  
20

21 *ID 4: ... Discrimination is 100% it's every where. Even at hospitals. If we ask something*  
22 *they take you easy.... When people see me they think that I don't understand or speak*  
23 *English. Even at job. When I was working that lady gave me very hard time.... The way*  
24 *you dress up. They don't like you. If you dress like their own dress, if you speak like them*  
25 *they will like you. But if you dress your own dress they will not happy.*  
26  
27  
28  
29  
30  
31  
32  
33  
34

### 35 **Discussion**

36  
37  
38 Study findings highlight the multi-dimensional nature of the aetiology models of  
39  
40 depression among SA immigrant women in Toronto, Canada.  
41  
42  
43  
44

45 Similar to studies in other countries<sup>32-34</sup> women of SA background in Canada perceived  
46  
47 depression as an outcome of personal, family, cultural and social circumstances. Some of  
48  
49 the stress factors such as abuse, bereavement, sexual infidelity, and the stress of divorce,  
50  
51 were identified as the root causes of depression. Other stressors, like physical health  
52  
53 problems, aging and isolation, cultural distance, stigma, difficulties faced in Canada, and  
54  
55  
56  
57  
58  
59  
60

1  
2  
3  
4  
5 socio-economic problems were identified as continuous stressors but were considered  
6  
7 less important and were less frequent.

8  
9  
10 The participants endorsed a “personal-social-cultural” model for the aetiology of  
11  
12 depression. In contrast with those previous study findings, none of our study participants  
13  
14 had spiritual, supernatural or religious attributions of depression.

15  
16  
17 The majority of past studies on IEM of depression have used primary care patients with  
18  
19 symptoms of depression<sup>8,33</sup> or general population samples<sup>23</sup>. In contrast, our sample was  
20  
21 of women who were being followed by a community mental health provider. It may be  
22  
23 that our sample had more chronic or severe depression or were people who were more  
24  
25 accepting of social and biological explanations and mental health system treatment.  
26  
27

28  
29  
30  
31 The findings reveal the depth of violent and traumatic living experiences suffered by  
32  
33 some women of SA origin. Some of their stories had remained secret for years. The  
34  
35 association between recent life events and depression has been well documented<sup>36-40</sup>. As  
36  
37 has the association with long-term negative self esteem, lack of social support, loss of  
38  
39 intimate relationship, living alone, and poor physical health conditions<sup>38-40</sup>.

40  
41  
42  
43  
44  
45 Immigrants face many challenges in their new countries; however, such challenges can  
46  
47 be more profound during the adjustment process for women with less education and  
48  
49 power<sup>39</sup>. First generation SA women have been reported to be more likely to have lower  
50  
51 self-evaluation and self-esteem<sup>16</sup>. The existing vulnerabilities and powerlessness of some  
52  
53 SA women may increase after their arrival to Canada<sup>41</sup>. The degree and nature of abuse  
54  
55  
56  
57  
58  
59  
60

1  
2  
3  
4  
5 and oppression faced by SA women in Canada has been well documented by previous  
6  
7 studies<sup>42, 43</sup>. Our participants indicated that this was a major cause of depression<sup>44</sup>.  
8  
9

10  
11 Divorce or separation is still considered unacceptable in many South Asian groups<sup>45</sup>.  
12

13  
14 Lack of traditional support systems to solve domestic violence and marriage disputes in  
15  
16 immigrant groups is problematic. These are designed to solve marriage problems and  
17  
18 keep the marriage together<sup>23, 41</sup>. The lack of these led to some of the women in this study  
19  
20 to get support from legal support services in Canada which led to divorce.  
21  
22  
23

24  
25  
26 There is some evidence that people of SA origin in Canada maintain close ties with their  
27  
28 country of origin and more strongly preserve their cultural heritage<sup>26</sup>. This was confirmed  
29  
30 in by the views of old aged group. However, results further indicate that strong  
31  
32 attachment to the culture of their own countries has created a cultural distance and  
33  
34 conflict between parents and children.  
35  
36  
37

38  
39  
40 We acknowledge the fact that this is a small study. It was based in Toronto and there  
41  
42 may be differences in SA populations living in rural areas and different urban areas in  
43  
44 Canada. The study also uses the term SA to identify a broad group of people with  
45  
46 significant cultural, social and historical differences. It is of interest that despite this their  
47  
48 narratives and the causes they thought were the main reasons for their depression were  
49  
50 similar. We do not know how representative the results are. Indeed participants were  
51  
52 selected from a community based mental health agency and this inevitably introduces an  
53  
54  
55  
56  
57  
58  
59  
60

1  
2  
3  
4  
5 element of sampling bias. It may be that we selected people who had more severe  
6  
7 depression, we may also have selected people who were more likely to accept  
8  
9 mainstream help. However, with regards to the last point it is worth pointing out that the  
10  
11 service we used to identify participants is a community based agency which specifically  
12  
13 offers help to racialised groups and is run by multi-cultural staff with a SA woman as the  
14  
15 chief executive. The service is funded by Ontario but is not considered by many as  
16  
17 mainstream. Those who did not speak English were excluded and this may have skewed  
18  
19 the demographic. Despite all of this the narratives from our participants made the authors  
20  
21 feel compelled to share the data. This study does offer an in depth and sometimes  
22  
23 harrowing insight into the world of SA women in Toronto and the perceived causes of  
24  
25 their depression. It offers possible avenues that could be further investigated for the  
26  
27 development of health promotion or illness prevention targeted at this population.  
28  
29  
30  
31  
32  
33  
34  
35

36 This pilot study used a qualitative approach. However, it may be that a larger scale  
37  
38 mixed methods approach would allow quantification of the rates of particular risk factors  
39  
40 and their associations and interactions. A large scale, mixed method study, involving both  
41  
42 male and female participants, may be required to explore in more depth the IEMs among  
43  
44 South Asians.  
45  
46  
47  
48

### 49 **Summary**

50 In summary, this study provides an insight to conceptual models of depression among the  
51  
52 SA immigrant women in Toronto, Canada. Attributions of depression heavily consisted  
53  
54 of individual, family, relationships, social, cultural or economic consequences rather than  
55  
56  
57  
58  
59  
60



1  
2  
3  
4  
5 biological or spiritual causation. The findings of this study further enhance our  
6  
7 understanding of the social determinants of mental health, and clearly show how  
8  
9 individuals understand the combination of individual, family, social or environmental  
10  
11 causation. The results of this study may have implications for policy, practice and  
12  
13 education. For the communities who heavily rely on personal-social-cultural models of  
14  
15 depression, it may be more beneficial and effective to provide a combination of psycho-  
16  
17 social and biomedical treatments. Culturally appropriate support to mediate domestic  
18  
19 problems may be important in decreasing the rates and improving the outcomes for SA  
20  
21 women.  
22  
23  
24  
25  
26  
27  
28  
29  
30  
31  
32  
33  
34  
35  
36  
37  
38  
39  
40  
41  
42  
43  
44  
45  
46  
47  
48  
49  
50  
51  
52  
53  
54  
55  
56  
57  
58  
59  
60

### References

1. Karasz A, Garcia N, Ferri L. Conceptual models of depression in primary care patients: A comparative study. *J Cross Cult Psychol.* 2009; 40(6):1041-1059.
2. Kleinman A. *Patients and their healers in the context of culture.* Berkeley CA: University of California Press;1980.
3. Kleinman A. *The illness narratives: Suffering, healing and the human condition.* New York: Basi Books Inc. Publishers;1988.
4. Lloyd KR, Jacob KS, Patel V, et al. The development of the Short Explanatory Model Interview (SEMI) and its use among primary-care attender's with common mental disorders. *Psychol Med.*1998; 28:1231-1237.
5. Goldberg D, Huxley P. *Mental illness in the community: The pathway to psychiatric care.* London; Tavistock. 1980.
6. McCabe R, Priebe S. Explanatory models of illness in schizophrenia: comparison of four ethnic groups. *Br J Psychiatry.* 2004. 185:25-30.
7. Bhana K, Daniels CS. Generational changes in conceptions of mental illness: A study of a South African Indian sample. *Journal of Cross Cultural Psychology.* 1986;17:493-504.
8. Brown C, Dunbar-Jacob J, Palenchar DR, et al. Primary care patients' personal illness models for depression: A preliminary investigation. *Fam Pract.* 2001; 18(9):314-320.

- 1  
2  
3  
4  
5 9. Lackey GF. Feeling blue in Spanish: A qualitative inquiry of depression among  
6 Mexican immigrants. *Soc Sci Med.* 2008;67:228-237.  
7
- 8  
9 10. Sumathipala A, Hewege S, Hanwella R, et al. Randomized controlled trial of  
10 cognitive behaviour therapy for repeated consultations for medically unexplained  
11 complaints: A feasibility study in Sri Lanka. *Psychol Med.* 2000; 30(4):747-757.  
12
- 13 11. Bhugra D, Mastrogianni A. Globalization and mental disorders. *Br J Psychiatry.*  
14 2004;184:10-20.  
15
- 16 12. Canadian Mental Health Association. Fast Facts: Mental Health/Mental Illness  
17 [cited 2011 Apr 8]. Available from:  
18 [http://www.cmha.ca/bins/content\\_page.asp?cid=6-20-23-43](http://www.cmha.ca/bins/content_page.asp?cid=6-20-23-43).  
19
- 20 13. Health Canada. A proactive approach to good health. Report to the Auditor General  
21 of Canada, Chapter 9.[cited 2011 Jun 5]. Available from: [http://www.oag-](http://www.oag-bvg.gc.ca/internet/English/parl_oag_200112_09_e_11830.html[on-line])  
22 [bvg.gc.ca/internet/English/parl\\_oag\\_200112\\_09\\_e\\_11830.html\[on-line\]](http://www.oag-bvg.gc.ca/internet/English/parl_oag_200112_09_e_11830.html[on-line]).  
23  
24
- 25 14. Kirmayer LJ, Weinfeld M, Burgos G, et al. Use fo health care service for  
26 psychological distress by immigrants in and urban multicultural milieu. *Can J*  
27 *Psychiatry.* 2007;52(5):295-304.  
28  
29
- 30 15. Whitley R, Kirmayer LJ, and Groleau D. Understanding immigrants' reluctance to  
31 use mental health services: A qualitative study from Montreal. *Can J Psychiatry.*  
32 2006;51(4):205-209.  
33  
34
- 35 16. Lai DWL, Surood S. Predictors of depression in aging South Asian Canadian. *J*  
36 *Cross Cult Gerontol.* 2008; 23:57-75.  
37
- 38 17. Beiser M, Simich L, Pandalangat, N. Community in distress: mental health needs  
39 and help-seeking in the Tamil community in Toronto. *International Migration.*  
40 2003;41(5):233-245.  
41  
42
- 43 18. Simich L, Hamilton H, Baya BK. Mental distress, economic hardship and  
44 expectations of life in Canada among Sudanese newcomers. *Transcult Psychiatry.*  
45 2006;43(3):419-445.  
46
- 47 19. Hammarstrom A, Lehti A, Danielsson U, et al. Gender-related explanatory models  
48 of depression: A critical evaluation of medical articles. *Public Health.* 2009;  
49 123:689-693.  
50  
51
- 52 20. Goldstein B, Rosselli F. Etiological paradigms of depression: The relationship  
53 between perceived causes, empowerment, treatment preferences, and stigma.  
54 *Journal of Mental Health.* 2011;12(6):551-563.  
55  
56  
57  
58  
59  
60

- 1
- 2
- 3
- 4
- 5 21. Schulberg HC, McCelland MA. Conceptual model for educating primary care
- 6 providers in the diagnosis and treatment of depression. *Gen Hosp Psychiatry*.
- 7 1987;9:1-10.
- 8
- 9
- 10 22. Campbell LC, Clauw DJ, Keefe FJ. Persistent pain and depression: A
- 11 biosychosocial perspective. *Biol Psychiatry*. 2003;54(3):399-409.
- 12
- 13 23. Karasz A. Cultural differences in conceptual models of depression. *Soc Sci Med*.
- 14 2005;60(7):1625-1635.
- 15
- 16 24. Schreiber R, Hartrick GK. Keeping it together: How women use the biomedical
- 17 explanatory model to manage the stigma of depression. *Issues Mentl Health Nurs*.
- 18 2002;23:91-105.
- 19
- 20
- 21 25. Statistics Canada. Ethnic origin and visible minorities, Release no 72011. [cited
- 22 2010 Dec 5]. Available from: <http://www12.statcan.gc.ca/census->
- 23 [recensement/2006/rt-td/eth-eng.cfm](http://www12.statcan.gc.ca/census-).
- 24
- 25
- 26 26. Tran K, Kaddatz J, Allard P. South Asians in Canada: Unity through diversity.
- 27 *Canadian Social Trends: Statistics Canada Catalogue*. 2005.
- 28
- 29 27. Hammarstrom A, Lehti A, Danielsson U, et al. Gender-related explanatory models
- 30 of depression: A critical evaluation of medical articles. *Public Health*. 2009;
- 31 123:689-693.
- 32
- 33 28. Kuehner C. Gender differences in unipolar depression: an update of
- 34 epidemiological findings and possible explanations. *Acta Psychiatr Scand*.
- 35 2003;108(3):163-174.
- 36
- 37
- 38 29. Creed F, Winterbottom M, Tomenson B, et al. Preliminary study of non-psychotic
- 39 disorders in people from the Indian subcontinent living in UK and India. *Acta*
- 40 *Psychiatr Scand*. 1999;99(4):257-260.
- 41
- 42
- 43 30. Strauss AL and Corbin JM *Basics of qualitative research; Techniques and*
- 44 *procedures for developing grounded theory*. London: Sage; 1998.
- 45
- 46 31. QSR International. NVivo qualitative data analysis software; QSR International Pty
- 47 Ltd. Version 9. 2010.
- 48
- 49 32. Bhui K, Bhugra D, Goldberg D. Causal explanations of distress and general
- 50 practitioners' assessments of common mental disorder among Punjabi and English
- 51 attendees. *Spc Psychiatry Psychiatr Epidemiology*. 2002;37:37-45.
- 52
- 53
- 54 33. Patel V, Pereira J, Mann AH. Somatic and psychological models of common
- 55 mental disorder in primary care in India. *Psychol Med*. 1998;28: 135-143.
- 56
- 57
- 58
- 59
- 60

- 1  
2  
3  
4  
5 34. Ravi Shankar B, Saravanan B, Jacob KS. Explanatory models of common mental  
6 disorders among traditional healers and their patients in rural South India. *Int J Soc*  
7 *Psychiatry*. 2006;52(3):221-233.  
8
- 9  
10 35. Jacob KS, Bhugra D, Lloyd KR, et al. Common mental disorders, explanatory  
11 models and consultation behaviour among Indian women living in the UK. *J R Soc*  
12 *Med*. 1998;91:66-71.  
13
- 14 36. Holmes TH, Rahe RH. The Social Readjustment Rating Scale. *J Psychosom Res*.  
15 1967;11:213-218.  
16
- 17 37. Prince M, Harwood RH, Blizard RA, et al. Social support deficits, loneliness and  
18 life events as risk factors for depression in old age. The Gospel Oak Project VI.  
19 *Psychol Med*. 1997;27:323-332.  
20
- 21 38. Weich S, Lewis G. Poverty, unemployment and common mental disorders:  
22 population based cohort study. *BMJ*. 1998;317:115-119.  
23
- 24 39. Ahmad F, Shik A, Vanza R, et al. Voices of South Asian women: Immigration and  
25 mental health. *Women and Health*. 2004;40(4):113-130.  
26
- 27 40. Schulz A, Israel B, Williams D, et al. Social inequalities, stressors and self reported  
28 health status among African American and white women in the Detroit metropolitan  
29 area. *Soc Sci Med*. 2000; 51:1639-1653.  
30
- 31 41. Morrison L, Guruge S, Snar KA. Sri Lankan Tamil immigrants in Toronto: Gender,  
32 marriage patterns and sexuality. In: Kelson G, Delaureat B, editors. *Gender,*  
33 *Immigration, and Policy*. New York: New York University Press; 1999. p 144-160.  
34
- 35 42. Ahmad F, Driver N, McNally MJ, et al. "Why doesn't she seek help for partner  
36 abuse?" An exploratory study with South Asian immigrant women. *Soc Sci Med*.  
37 2009;69:613-622.  
38
- 39 43. Mason R, Hyman I, Berman H, et al. "Violence is an international language": Tamil  
40 women's perceptions of intimate partner violence. *Violence Against Women*. 2008;  
41 14:1397-1412.  
42
- 43 44. Shackelford TK, Buss DM, Bennett K. Forgiveness or breakup: Sex differences in  
44 responses to a partner's infidelity. *Cognition and Emotion*. 2002; 16(2):299-307.  
45
- 46 45. Huang W. An Asian perspective on relationship and marriage education. *Family*  
47 *Process*. 2005;44(2):161-173.  
48  
49  
50  
51  
52  
53  
54  
55  
56  
57  
58  
59  
60

- 1  
2  
3  
4  
5 48. Sadavoy J, Meier R, Ong AYM. Barriers to access to mental health services for  
6 ethnic seniors: The Toronto study. Can J Psychiatry. 2011; 49(3):192-199.  
7  
8  
9  
10

11  
12 **Table1: Thematic framework of the results**  
13

| 1. Individual, family and relationship factors | Sub themes                                                                                                                                                                                                                                                                                                                                                                          |
|------------------------------------------------|-------------------------------------------------------------------------------------------------------------------------------------------------------------------------------------------------------------------------------------------------------------------------------------------------------------------------------------------------------------------------------------|
| Abuse                                          | <p><b>Financial/economic:</b> Controlling of income, forcing to work, stealing money, unauthorised use of credit cards, forcing to obtain loans.</p> <p><b>Psychological:</b> Humiliation, threatening to take custody of children, restricting personal contacts, forcing not to talk family and friends.</p> <p><b>Physical:</b> Beating, slapping, pulling hair and choking.</p> |
| Physical health problems                       | Multiple chronic illness, diabetes, high blood pressure, osteoporosis and fibromyalgia.                                                                                                                                                                                                                                                                                             |
| Bereavement                                    | Lack of family support, difficulty in attending counselling, no social support networks in the neighbourhood.                                                                                                                                                                                                                                                                       |
| Sexual infidelity                              | Social and emotional isolation.                                                                                                                                                                                                                                                                                                                                                     |
| Aging and isolation                            | Difficulties in living with children's families, isolation, extra work loads such as child caring for grandchildren.                                                                                                                                                                                                                                                                |
| 2. Culture and migration                       |                                                                                                                                                                                                                                                                                                                                                                                     |
| Stress of divorce and separation               | Negative response from family and community, cultural taboos on second marriage, loss of identity, fear and uncertainty of children.                                                                                                                                                                                                                                                |
| Cultural distance                              | <p><b>Parents:</b> worry concerning westernizing of children, out of culture marriages.</p> <p><b>Children:</b> restricted family environments, strict rules, arranged marriages.</p>                                                                                                                                                                                               |
| Stigma                                         | Labelling as a mentally ill, isolation from community                                                                                                                                                                                                                                                                                                                               |
| Difficulties in new country                    | Loss of expectation, lack of understanding of systems, language difficulties.                                                                                                                                                                                                                                                                                                       |
| 3. Socio-economic factors                      |                                                                                                                                                                                                                                                                                                                                                                                     |
| Economic difficulties                          | Lack of income from government income support programs, loss of jobs                                                                                                                                                                                                                                                                                                                |
| Discrimination and racism                      | Unfair treatments, racist acts, acts of hatred, discrimination for jobs                                                                                                                                                                                                                                                                                                             |



**Qualitative study of the perceived causes of depression in  
South Asian origin women in Toronto**

|                                    |                                                                                                                                                                                                                   |
|------------------------------------|-------------------------------------------------------------------------------------------------------------------------------------------------------------------------------------------------------------------|
| Journal:                           | <i>BMJ Open</i>                                                                                                                                                                                                   |
| Manuscript ID:                     | bmjopen-2011-000641.R1                                                                                                                                                                                            |
| Article Type:                      | Research                                                                                                                                                                                                          |
| Date Submitted by the Author:      | 15-Jan-2012                                                                                                                                                                                                       |
| Complete List of Authors:          | ekanyake, samanthika; CAMH, Health services and health equity<br>ahmed, farah; york university,<br>McKenzie, Kwame; centre for addiction and mental health and university of<br>toronto, social equity and health |
| <b>Primary Subject<br>Heading</b>: | Mental health                                                                                                                                                                                                     |
| Secondary Subject Heading:         | Health services research, Mental health, Patient-centred medicine,<br>Qualitative research                                                                                                                        |
| Keywords:                          | south asian, women, depression, aetiology, ethnicity                                                                                                                                                              |
|                                    |                                                                                                                                                                                                                   |

SCHOLARONE™  
Manuscripts

Peer Review Only

1  
2  
3  
4  
5  
6  
7  
8  
9  
10  
11  
12  
13  
14  
15  
16  
17  
18  
19  
20  
21  
22  
23  
24  
25  
26  
27  
28  
29  
30  
31  
32  
33  
34  
35  
36  
37  
38  
39  
40  
41  
42  
43  
44  
45  
46  
47  
48  
49  
50  
51  
52  
53  
54  
55  
56  
57  
58  
59  
60

## Qualitative cross sectional study of the perceived causes of depression in South Asian origin women in Toronto

Samanthika Ekanayake, PhD<sup>1</sup>,

Farah Ahmad, PhD<sup>2</sup> and

Kwame McKenzie, MD<sup>3\*</sup>

\*Corresponding Author

Kwame McKenzie.

<sup>3</sup>Director, Social Aetiology of Mental Illness (SAMI) Training Program, Health Systems and Health Equity Research Unit, Centre for Addiction and Mental Health (CAMH),

455 Spadina Avenue, Suite 300

Toronto, ON, Canada. M5S 2G8

Phone: 416 535 8501 Ext 7636

Email: Kwame\_McKenzie@camh.net

### Affiliations

<sup>1</sup> Post Doctoral Research Fellow, Social Aetiology of Mental Illness (SAMI) Training Program, Health Systems and Health Equity Research Group, Centre for Addiction and Mental Health (CAMH)

<sup>2</sup> Assistant Professor, School of Health Policy and Management, Faculty of Health, York University



1  
2  
3  
4  
5  
6  
7  
8  
9  
10  
11  
12  
13  
14  
15  
16  
17  
18  
19  
20  
21  
22  
23  
24  
25  
26  
27  
28  
29  
30  
31  
32  
33  
34  
35  
36  
37  
38  
39  
40  
41  
42  
43  
44  
45  
46  
47  
48  
49  
50  
51  
52  
53  
54  
55  
56  
57  
58  
59  
60

For peer review only

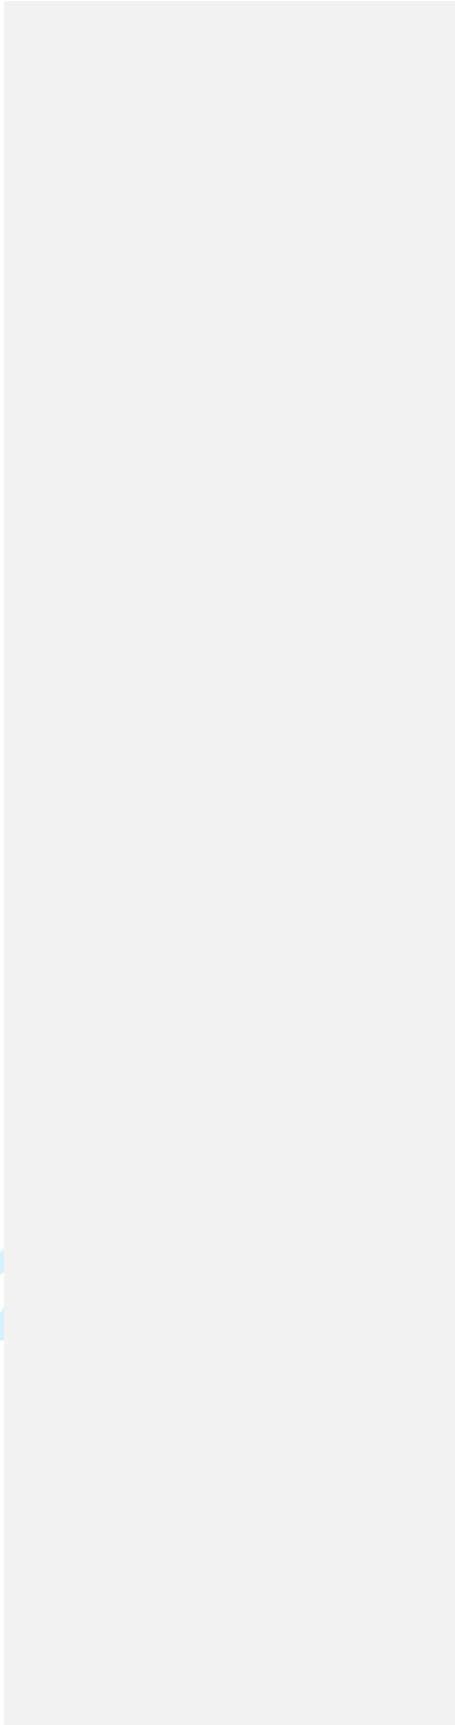

1  
2  
3  
4  
5  
6  
7  
8  
9  
10  
11 **Objective:** To explore how South Asian origin women in Toronto, Canada, understand  
and explain the causes of their depression.

12 **Design:** Cross sectional in depth qualitative interviews

13 **Setting:** Outpatient service in Toronto, Ontario

14 **Participants:** Ten women with symptoms of depression aged between 22-65 years of  
15 age. Seven ~~7~~ were ~~from~~ -India, two ~~2~~ from 2 Sri-Lanka and one ~~1~~ ~~from~~ ~~in~~ Pakistan. Four  
16 4 were Muslim, three ~~3~~ Hindu and three ~~3~~ Catholic. Two participants had university  
17 degrees, one a high school diploma and seven had completed less than a high school  
18 education. 8 ~~Eight~~ were married, one ~~1~~ was unmarried and one ~~1~~ a widow.

19 **Primary outcome:** ~~Causes of depression as presented in thematic content analysis with~~  
20 ~~some elements of grounded theory of in depth interviews.~~

21 **Results:** Three main factors emerged from the participant narratives as the causes of  
22 depression: family and relationships; culture and migration; and, socio-economic. The  
23 majority of the participants identified domestic abuse, marital problems and interpersonal  
24 problems in the family as the cause of their depression. Culture and migration and socio-  
25 economic factors were considered contributory. None of our study participants reported  
26 spiritual, supernatural, or religious factors as causes of depression.

27 **Conclusion:** A “personal-social-cultural” model emerged as the aetiological paradigm  
28 for depression. Given the perceived causation psycho-social treatment methods may be  
29 more acceptable for South Asian origin women.  
30  
31  
32  
33  
34  
35  
36  
37  
38  
39  
40  
41  
42  
43  
44  
45  
46  
47  
48  
49  
50  
51  
52  
53  
54

**Article focus**

An exploration of the perceived causes of depression in women of South Asian origin in Toronto, Canada.

**Key messages**

Depression in South Asian women in Toronto may be caused by social problems that could be the target for prevention and health promotion.

Given the perceived causation, psycho-social interventions may be more acceptable for South Asian origin women in Toronto.

Links between social and health services may be important in decreasing the burden of depression in South Asian origin women in Toronto.

**Strengths**

This study was able to interview a diverse cross section of South Asian origin women in a community setting.

The interviewer was also a South Asian woman and this may have facilitated disclosure.

**Weaknesses:**

The study did not disaggregate the South Asian group into different religious groups or countries of origin.

[This study only included participants who could speak English.](#)

**Key Words:** South Asian, women, causes of depression, qualitative, illness models

**Funding Support and Acknowledgements**

This research was supported by a strategic training grant (grant number TUF 96115) from the Canadian Institutes of Health Research (CIHR) provided for the Social Aetiology of Mental Illness (SAMI) Training Program. The authors would like to thank “Across Boundaries” a community based mental health centre, for their support during data collection.

**All authors were involved in developing the concept, methodology, data analysis and drafting and editing the paper.**

1  
2  
3  
4  
5  
6  
7  
8  
9  
10  
11  
12  
13  
14  
15  
16  
17  
18  
19  
20  
21  
22  
23  
24  
25  
26  
27  
28  
29  
30  
31  
32  
33  
34  
35  
36  
37  
38  
39  
40  
41  
42  
43  
44  
45  
46  
47  
48  
49  
50  
51  
52  
53  
54  
55  
56  
57  
58  
59  
60

None of the authors has a conflict of interest.

For peer review only

## Introduction

The way that people understand and explain illness depends on many factors including cultural background, education level, health beliefs, attitudes and knowledge and trust in health care systems.<sup>1-3</sup>

Field Code Changed

Illness explanatory models (IEM) examine the perspectives people have of illness; mainly focusing on aetiology, symptoms, severity, prognosis, reasons for consultation, and treatment preferences.<sup>4</sup> Research suggest that IEM ultimately determine a number of factors including help-seeking behaviour, treatment compliance, satisfaction, selection of pathways to care and selection of treatment.<sup>5 6</sup> IEM may vary between and within ethnic groups, gender groups, and different generations as well as for different types of illness.<sup>7-</sup>

Field Code Changed

Field Code Changed

Field Code Changed

Field Code Changed

<sup>9</sup> A better understanding of conceptual models of illness may help to improve service delivery and clinical outcomes and reduce health care cost.<sup>10</sup>

Field Code Changed

Depression is one of the most under-recognized and under-treated mental illnesses in primary care globally.<sup>11</sup> It is one of the most common and costly mental health problems in Canada.<sup>12 13</sup>

Field Code Changed

Field Code Changed

Field Code Changed

The rates of depression in immigrants in Canada varies; some groups such as older adults and some South and East Asian groups may be at increased risk.<sup>14</sup> Though the use of general medical care is similar for immigrants and non-immigrants but immigrants are less likely to use mental health services.<sup>15 16</sup> The reasons for the increased rates of

Field Code Changed

Field Code Changed

depression have not been well documented in Canada but with regards to service use studies report that <sup>17+7 18 19+8</sup> "bio-medical" models of health systems may act as barriers to care by conflicting with the views of patients from other traditions.

Field Code Changed

Field Code Changed

Theoretical models of the aetiology of depression are diverse.<sup>20+9</sup> Bio-medical models consist of genetic, physical, or somatic causation. Socio-cultural models include life circumstances and cultural factors, while psychological models focus on psychological or behavioural factors. A multiple causation, "bio-psycho-social", model has been widely accepted.<sup>21-23</sup>

Field Code Changed

Field Code Changed

Formatted: Do not check spelling or grammar, Superscript

The lay understanding of depression varies between cultural and ethnic groups. For instance in European countries the majority of patients endorse "bio-psychiatric" models, while in East and South East Asia psycho-social models predominate.<sup>24</sup> Some argue that this may be linked to differences in help seeking as the former prefer psychiatric treatment<sup>8</sup> while latter prefer more traditional socially focussed healing modalities.<sup>14, 19+6</sup>

Field Code Changed

Field Code Changed

Field Code Changed

Though it should be noted that patients may not seek help when there is clearly a need.<sup>19</sup>

Formatted: Superscript

Among the few Canadian studies that are focused on conceptual understandings of depression, Schreiber and Hatrick<sup>25</sup>, reported that Euro-North American women predominantly report a "bio-medical" explanatory models. But, to our knowledge, there are no studies conducted in Canada that have investigated the conceptual models of depression in minority ethnic groups. In order to begin to fill this gap in the literature, we

Field Code Changed

1  
2  
3  
4  
5  
6  
7  
8  
9  
10 conducted a qualitative study of women of South Asian origin. The aim of the study was  
11 to identify and document how South Asian origin women in Toronto, Canada, understand  
12 and explain the causes of their depression. This was an initial study to test the feasibility  
13 of recruitment, to see whether South Asian women with depression would speak with  
14 researchers about causation and to map out the range of models of causation in  
15 population to aid the development of questionnaires and hypotheses for possible larger  
16 mixed methods studies.  
17  
18  
19  
20  
21  
22  
23  
24

25 The South Asian population is the largest visible minority in Canada.<sup>26</sup> 'South Asian'  
26 refers to people who originate from India, Sri Lanka, Bangladesh, Pakistan, and Nepal.  
27 They are a diverse group with significant ethnic, religious, and linguistic differences; but  
28 it has been argued that these groups share commonalities in their social networks, family  
29 interactions, and customs and traditions.<sup>14+6 27</sup> This study investigated only one gender  
30 groups because conceptual models of depression vary by gender.<sup>9</sup> Women were chosen  
31 because the prevalence and incidence of depression is higher in this group.<sup>28 29</sup> Exposure  
32 to risk factors may vary by gender group.<sup>30</sup>  
33  
34  
35  
36  
37  
38  
39  
40  
41  
42

### 43 Method

44 The study used qualitative techniques to analyse in depth individual interviews.  
45  
46  
47

48 The sample included women over 18 years old, who were born in South Asia or whose  
49 parents were born in South Asia. 'South Asia was defined as per<sup>2</sup> Statistics Canada as  
50  
51  
52  
53  
54

1  
2  
3  
4  
5  
6  
7  
8  
9  
10  
11  
12  
13  
14  
15  
16  
17  
18  
19  
20  
21  
22  
23  
24  
25  
26  
27  
28  
29  
30  
31  
32  
33  
34  
35  
36  
37  
38  
39  
40  
41  
42  
43  
44  
45  
46  
47  
48  
49  
50  
51  
52  
53  
54  
55  
56  
57  
58  
59  
60

India, Sri Lanka, Bangladesh, Pakistan, and Nepal. Recruitment was from a community based mental health agency which provides services specifically to racialised communities in Toronto, Ontario in 2010. Community workers referred participants to the study or participants answered an advertisement placed in the community agency.

Participants were informed about researcher' ethnic background, occupation and credentials. Also a description of purpose of the research was given with the study information materials. They were then approached face to face by the researchers and consented.

Those who were unable to read and speak in English were not included in this pilot study as there was no funding for interpreters. In order to increase the heterogeneity of the sample, we purposively recruited participants who had migrated from different countries, had differing marital status and belonged to different religious groups.

Depression was confirmed using GHQ 12 questionnaire. Those who scored more than 12 points (using the Likert scale) were invited for interview. Participants were interviewed alone at the community mental health agency offices. It provided them with an environment to speak freely and openly about their experiences. The aim was to get a rich description of the perceived causes of depression from the perspective of the respondents.

Interviews were conducted by the first author (SE), a South Asian immigrant woman, and lasted 45-60 minutes. A topic guide was used to direct the flow of the interviews. The structure of the interview was as follows: participants were first asked to explain their



1  
2  
3  
4  
5  
6  
7  
8  
9  
10 personal, family and household circumstances. Then they were invited to talk about their  
11 health, their understanding of causes of their depression, their daily lifestyles,  
12 employment, the nature of any social and economic difficulties, and any social problems  
13 they faced. Finally, the participants were asked to comment on how they believe that  
14 those circumstances related to their mental health status. Interviews were taped and  
15 transcribed. All the transcripts were anonymized. Field notes were also made during  
16 the interview.  
17  
18  
19  
20  
21  
22  
23  
24

25 Ethics approval was obtained from the Research Ethics Board of the Centre for Addiction  
26 and Mental Health in Toronto, Ontario prior to the recruitment. Informed consent was  
27 obtained prior each of the interview.  
28  
29  
30  
31  
32

33 Thematic content analysis with some elements of grounded theory<sup>31</sup> was used to analyse  
34 the data. Data collection, coding and analysis were inter-related processes. The analyses  
35 of interview transcripts were begun after the first interview. We used a modified version  
36 similar to the three step coding and analysis approach (open coding, axial coding and  
37 selective coding) introduced by the Strauss and Corbin.<sup>31</sup> Each transcript was read at least  
38 twice and core concepts were identified. Codes were assigned for the selected texts. This  
39 was further developed by adding sub-themes which were followed by the detailed coding.  
40  
41  
42  
43  
44  
45

46 A preliminary coding scheme was developed after indentifying the major themes. All  
47 three researchers have post doctoral training in qualitative research and have published  
48 qualitative papers in peer reviewed journals. The relationships and differences between  
49  
50  
51  
52  
53  
54

1  
2  
3  
4  
5  
6  
7  
8  
9  
10 codes were identified. Coding was done separately by each researcher (SE and KM), and  
11 then was discussed by the research team. The researchers cross-checked their coding  
12 structures and, in cases where mismatches occurred, we conducted detailed discussions to  
13 achieve consensus. NVivo qualitative data analysis software<sup>32</sup> was used for the data  
14 analysis. Recruitment was stopped when no new themes were being identified from the  
15 transcripts.  
16  
17  
18  
19  
20  
21  
22

### 23 Results

24 The sample:

25  
26  
27 There were ten participants in the study. Everyone who was referred took part. There  
28 were no dropouts. They were aged between 22-65. Seven women were born in India, two  
29 in Sri Lanka and one in Pakistan. Four women were Muslim, three Hindu and three  
30 Catholic. Two participants had university degrees, one had a high school diploma and  
31 seven had completed less than a high school education. None of the women were  
32 employed, and all were dependent on some form of income support from the government  
33 such as Ontario Disability Support Program (ODSP), Employment Insurance (EI), or the  
34 Old Age Security (OAS) program. Eight women were married, one was unmarried and  
35 the other was a widow. Two of the women had some history of mental illness other than  
36 depression.  
37  
38  
39  
40  
41  
42  
43  
44  
45  
46  
47

48 **Causes of depression:**  
49  
50  
51  
52  
53  
54

1  
2  
3  
4  
5  
6  
7  
8  
9  
10  
11  
12  
13  
14  
15  
16  
17  
18  
19  
20  
21  
22  
23  
24  
25  
26  
27  
28  
29  
30  
31  
32  
33  
34  
35  
36  
37  
38  
39  
40  
41  
42  
43  
44  
45  
46  
47  
48  
49  
50  
51  
52  
53  
54  
55  
56  
57  
58  
59  
60

Three significant factors that cause depression were emerged from participant's narratives:

- 1) individual, family and relationships;
- 2) culture and migration; and,
- 3) socio-economic.

Participants endorsed a variety of combinations of these problems with some identifying difficulties in all three as the cause of their depression. Table 1 presents a summary of themes and sub-themes emerged from the narratives.

Table 1 about here:

### **1. Individual, family and relationship factors**

Individual, family and relationship factors were identified as the primary cause of depression by the participants. Domestic abuse, infidelity, stress of divorce or separation, and bereavement were the main stressors behind the depression.

#### ***Abuse***

All members of the sample group experienced some form of domestic abuse such as physical, social, psychological, verbal or economic abuses from their intimate partners.

Prolonged traumatic and abusive experiences were viewed as the root cause of their depression.

1  
2  
3  
4  
5  
6  
7  
8  
9  
10 Financial or economic abuse was reported frequently by the participants. Seven Many  
11 women explained that they were forced to “find jobs”, “work all seven days”, or<sup>2</sup>, that  
12 they were not allowed to have their own bank accounts. Three Some of our participants  
13 claimed that their husbands stole money from them, used their credit cards without  
14 authorisation and that they were forced to get bank loans.  
15  
16  
17  
18  
19

20  
21 *ID 6 (45 years): "I had very stressful life..I worked in a factory. I used to work all 7*  
22 *days. On Fridays my husband used to come to my work place. He took my cheque and*  
23 *asked me to sign the back of it. He takes all the money and gives me \$20 per week for the*  
24 *bus pass. I felt desperate. I had no money for anything...and he told to everybody: “I*  
25 *have a money maker at home*” “<sup>2</sup>  
26  
27  
28  
29  
30  
31

32  
33 Restriction of personal contacts and demanding that women do not talk to other people in  
34 the neighbourhood were also identified as a main stressor. When husbands abandoned  
35 these women they were devastated as they were socially isolated and left with little or no  
36 access to money. Lack of understanding of support systems, and fear of talking to  
37 unknown people, together with language difficulties, led these women to remain silent.  
38  
39  
40  
41  
42  
43

44 Physical abuse, such as beating, slapping and hair pulling was mentioned by eight the  
45 majority of the women in the study group. According to the participants, their children  
46 were also victims of these incidents. The other forms of psychological or physical abuse,  
47  
48  
49  
50  
51  
52  
53  
54

1  
2  
3  
4  
5  
6  
7  
8  
9  
10 such as being forced to get out of their home, being forced to wear hijab and being  
11 called names were also mentioned.  
12  
13

14  
15 *ID 4 (45 years): "In India it's perfectly normal for your husband to beat you...you have*  
16 *no choice other than just suffering. When I came here, I thought it's normal too and he*  
17 *hit me very badly to my shoulders, even blood came and my children cried. Neighbors*  
18 *also heard. I had this experience for 17 years."*  
19  
20  
21  
22  
23

#### 24 25 **Health problems**

26  
27 Seven of the participant's had been affected by some form of physical health problem.

28 Narratives indicated that they felt overwhelmed by the stress of their poor health status.

29  
30 There were five some participants, who were suffering from prolonged multiple illnesses  
31 such as diabetes, high blood pressure, fibromyalgia, and osteoporosis.  
32  
33  
34  
35

36  
37 *ID 6 (45 years): "Sometimes I still I feel that why all these things happened to me. My*  
38 *whole body is paining. I was very active in the past... but now both hands are not good. I*  
39 *had an operation too. But still I can't even use my hand to eat food. Sometimes I keep*  
40 *plate on the table and eat like a dog."*  
41  
42  
43  
44  
45

#### 46 47 **Bereavement**

48 According to ID 8 (54 years old and a widow with no children), bereavement was the  
49 main cause of her depression.  
50  
51  
52  
53  
54

1  
2  
3  
4  
5  
6  
7  
8  
9  
10  
11 | *“ID 8 (54 years): “He is a very good husband, he never leave me alone. Every time when*  
12 | *I go to doctors appointment he comes with me. Now some times I don’t eat, don’t drink*  
13 | *and crying all the time. Even I can’t sleep. I remember him always. I got all this*  
14 | *condition when he passed away.”*  
15  
16  
17  
18  
19  
20

21 Lack of extended family support, language difficulties that prevented her from attending  
22 grief counseling, and an inability to develop supportive social networks in the  
23 neighborhood made ID 8 more vulnerable to complicated grief reactions.  
24  
25  
26  
27

### 28 ***Sexual infidelity***

29 The sexual infidelity of an intimate partner can be a devastating experience. Among the  
30 seven divorced or separated women in our sample, four mentioned that they discovered  
31 that their husbands were having extra-marital relationships. They reported worry, sadness  
32 and depression following this.  
33  
34  
35  
36  
37  
38  
39

### 40 ***Aging and isolation***

41 | *Two of the ~~Some~~ older aged participants commented that their married children were not*  
42 | *keen on caring for them, while others mentioned the burden of additional household*  
43 | *chores such as caring for their grandchildren. Feelings of emotional and physical*  
44 | *isolation, fear of the future because of their reliance on others and an inability to perform*  
45  
46  
47  
48  
49  
50  
51  
52  
53  
54

1  
2  
3  
4  
5  
6  
7  
8  
9  
10 their own household activities (due to poor physical and mental health) led them to feel  
11 hopelessness and despair.

## 12 13 14 15 **2. Culture and migration**

### 16 17 18 19 *Stress of divorce and separation*

20  
21 With the exception of one participant aged 33 years, none of the divorced or separated  
22 women were involved in secondary relationships. Thinking of a second marriage or  
23 having romantic relationships after marriage remains an 'unsuitable' or 'out of culture'  
24 concepts among the middle-aged and older women in this community. Results indicated  
25 that knowing that their former spouses had remarried or were currently involved in some  
26 sort of relationship brought these women more worry and jealousy.  
27  
28  
29  
30  
31  
32  
33

34  
35 Our samples claimed that traditionally in some South Asian cultures, divorce and  
36 separation are not acceptable and women may be blamed for a breakdown of their  
37 marriage. Participants painfully described the immense burden, stigma, and stress  
38 experienced once they were divorced or separated from their spouses.  
39  
40  
41  
42

43  
44 *ID 4 (45 years):* "—On the middle of the night he left me. I got a panic attack. I thought I  
45 am going to die. I was scared. How will society think now? What will happen to my  
46 children? How will my parents and my people react to me when I go to India? What am I  
47 going to tell them? When he started to get papers sent by the lawyer he phoned me and  
48  
49  
50  
51  
52  
53  
54

1  
2  
3  
4  
5  
6  
7  
8  
9  
10  
11 *told me I am a characterless woman. That was first time I went to court, your family no*  
12 *body do that.””.*  
13

14  
15 Participants also talked about the negative responses from their own family or other  
16 South Asian community members about their decision to get a divorce. Two Some of  
17 these women were still using their husbands’ surnames or lying about their actual family  
18 status, while others dealt with the problem by cutting themselves off from other South  
19 Asian people.  
20  
21  
22  
23  
24  
25  
26

### 27 ***Cultural distance***

28 Results showed that cultural distance between parent and children was also stressful for  
29 both groups. Those with strong South Asian values seemed to be more depressed and  
30 were not in a position to accept their children’s out-of-culture marriages or pre-marital  
31 relationships. They further believed that they did not have power or authority to influence  
32 their children.  
33  
34  
35  
36  
37  
38  
39

40  
41 *ID 3 (65 years): ““My son went out my culture and married. He married a Spanish girl.*  
42 *She doesn’t want me to be in his life. Although I try hard to tell him she was not really*  
43 *kind of people we need he didn’t listen to me. Now he is suffering. One day this woman*  
44 *asked me to make a beef soup. I don’t eat or even touch beef. I really keep rules that I*  
45 *was taught to live.””.*  
46  
47  
48  
49  
50  
51  
52  
53  
54  
55  
56  
57  
58  
59  
60



1  
2  
3  
4  
5  
6  
7  
8  
9  
10 In contrast, younger participants claimed they were suffering because of the strict rules of  
11 their parents. They identified themselves as being caught between traditional and modern.

12  
13 ~~Two of Some of~~ our participants believed that they were brought up in more restrictive  
14 family environments than other Canadian girls in their age groups. Some said they had  
15 been asked to ‘quit schools’ or ‘choose jobs that are suited to girls’ or have an arranged  
16 marriage<sup>2</sup>. Narratives further indicated that younger South Asian women were having  
17 more difficulty in negotiating their needs and expectations with their parents.  
18  
19  
20  
21  
22  
23

### 24 25 **Stigma**

26  
27 The cultural stigma of being labeled as a mentally ill person was also a continuous stress  
28 factor. ID 2 (30 years) revealed her observation about the South Asian community and  
29 explained that some people believe that a person with a mental illness is ‘an out control  
30 person’ or ‘should be looked down upon’ or they should be ‘scared to talk’ with them.  
31  
32  
33  
34

35  
36  
37 *ID 2: “My dad is saying that since you are mental, you should get married. And I said*  
38 *why? He said then your husband makes you happy. But if someone knows that I am a*  
39 *mentally ill, then they don’t marry me. In our society there is a big label on mental*  
40 *illness.”*  
41  
42  
43  
44

### 45 46 **Difficulties in new country**

47  
48 Migration related stress was also identified as a reason for depression. Migration is a  
49 transformation in immigrant’s lives and it is associated with high hopes. Lack of  
50  
51  
52  
53  
54

1  
2  
3  
4  
5  
6  
7  
8  
9  
10 understanding of the Canadian system, especially limited knowledge concerning the  
11 existing resources and language difficulties, made their lives more difficult and stressful.  
12

### 13 14 15 **Socio-economic factors** 16

#### 17 18 19 *Economic difficulties* 20

21 Almost all of the participants were living on form of government income support.

22 Participants acknowledged that depression was often linked to financial difficulties,  
23 especially when there is insufficient income support or loss of employment.  
24  
25  
26  
27

#### 28 29 *Discrimination and racism* 30

31 Subjective experiences with unfair treatment, racist acts, or acts of hatred from other  
32 Canadians were also identified as a cause of depression and powerlessness. Poorer access  
33 to 'high standard jobs' and differential treatment in health services and other service  
34 provision agencies were also highlighted. Participants openly talked about the challenges  
35 they faced in Canada such as loss of cultural identity and loss of social pride. Many  
36 Muslim women acknowledged that wearing of a 'hijab' caused some problems,  
37 especially after the 9/11 terrorist attack in the USA. Participants also mentioned that  
38 immediate supervisors of other cultural backgrounds believed that people of South Asian  
39 'ethnicity' were inferior.  
40  
41  
42  
43  
44  
45  
46  
47  
48  
49  
50  
51  
52  
53  
54  
55  
56  
57  
58  
59  
60

1  
2  
3  
4  
5  
6  
7  
8  
9  
10  
11  
12  
13  
14  
15  
16  
17  
18  
19  
20  
21  
22  
23  
24  
25  
26  
27  
28  
29  
30  
31  
32  
33  
34  
35  
36  
37  
38  
39  
40  
41  
42  
43  
44  
45  
46  
47  
48  
49  
50  
51  
52  
53  
54  
55  
56  
57  
58  
59  
60

*ID 4 (45 years): “Discrimination is 100% it’s every where. Even at hospitals. If we ask something they take you easy. When people see me they think that I don’t understand or speak English. Even at job. When I was working that lady gave me very hard time. The way you dress up. They don’t like you. If you dress like their own dress, if you speak like them they will like you. But if you dress your own dress they will not happy. “*

## Discussion

The study findings highlight the multi-dimensional nature of the aetiological models of depression among South Asian immigrant women in Toronto, Canada.

Similar to studies in other countries<sup>33-35</sup> women of South Asian background in Canada perceived depression as an outcome of personal, family, cultural and social circumstances. Some of the stress factors such as abuse, bereavement, sexual infidelity, and the stress of divorce, were identified as the root causes of depression. Other stressors, like physical health problems, aging and isolation, cultural distance, stigma, difficulties faced in Canada, and socio-economic problems were identified as continuous stressors but were considered less important and were less frequent.

The participants endorsed a personal-social-cultural model for the aetiology of depression. In contrast with those previous study findings, none of our study participants offered spiritual, supernatural or religious causes of their depression.<sup>36</sup>

The majority of past studies on IEM of depression have used primary care patients with symptoms of depression<sup>8, 34</sup> or general population samples.<sup>24</sup> In contrast, our sample was

Field Code Changed

1  
2  
3  
4  
5  
6  
7  
8  
9  
10 of women who were being followed by a community mental health provider. It may be  
11 that our sample had more chronic or severe depression or were people who were more  
12 accepting of social and biological explanations and mental health system treatment.  
13  
14

15  
16  
17 The findings reveal the depth of violent and traumatic living experiences suffered by  
18 some women of South Asian origin. Some of their stories had remained secret for years.  
19

20  
21 Such silence in the face of psychological trauma has been identified in other studies of  
22 women in other parts of the world.<sup>19</sup> The association between recent life events and  
23 depression has been well documented.<sup>37-41,37-41,37,38</sup> - As has the association with long-term  
24 negative self esteem, lack of social support, loss of intimate relationship, living alone,  
25 and poor physical health conditions.<sup>42-44,37,41,42</sup>  
26  
27  
28  
29  
30  
31

32  
33 The results of studies conducted with South Asian immigrant women in the UK are  
34 consistent with some of our findings.<sup>43,44,45,46</sup> The belief that depression has social  
35 origins seems to be common in South Asian groups. Many women from these groups  
36 link their depression with losses such as bereavement, ill-health or job related events.<sup>44,46</sup>  
37  
38  
39  
40  
41

42 Immigrants face many challenges in their new countries; however, such challenges can  
43 be more profound during the adjustment process for women with less education and  
44 power.<sup>42,45,37,43</sup> First generation South Asian origin women have been reported to be  
45 more likely to have lower self-evaluation and self-esteem.<sup>14,16</sup> The existing vulnerabilities  
46 and powerlessness of some South Asian women may increase after their arrival to  
47  
48  
49  
50  
51  
52  
53  
54

Formatted: Do not check spelling or grammar, Superscript

Field Code Changed

Field Code Changed

Field Code Changed

Field Code Changed

1  
2  
3  
4  
5  
6  
7  
8  
9  
10 Canada,<sup>45,47</sup> The degree and nature of abuse and oppression faced by South Asian women  
11 in Canada has been well documented by previous studies.<sup>46, 47,48, 49</sup> Our participants  
12 indicated that this was a major cause of depression.<sup>48,50</sup>

Field Code Changed

Field Code Changed

Field Code Changed

13  
14  
15  
16  
17 Divorce or separation is still considered unacceptable in many South Asian groups.<sup>49,51</sup>  
18  
19 Lack of traditional support systems to solve domestic violence and marriage disputes in  
20 immigrant groups is problematic. These are designed to solve marriage problems and  
21 keep the marriage together.<sup>23, 41</sup> Lack of these led to some of the women in this study to  
22 get support from legal support services in Canada which led to divorce.  
23  
24  
25  
26  
27

Field Code Changed

28  
29 There is some evidence that people of South Asian origin in Canada maintain close ties  
30 with their country of origin and more strongly preserve their cultural heritage.<sup>27</sup> This was  
31 confirmed in by the views of old aged group. However, results further indicate that strong  
32 attachment to the culture of their own countries has created a cultural distance and  
33 conflict between parents and children. The cultural vulnerability faced by immigrants,  
34 specially by the South Asian immigrant women has been identified as a main cause for  
35 depression by studies conducted in the UK.<sup>43, 50,45, 52</sup>

Field Code Changed

Field Code Changed

36  
37  
38  
39  
40  
41  
42  
43  
44 We acknowledge the fact that this is a small study. It was based in Toronto and there  
45 may be differences in SA populations living in rural areas and different urban areas in  
46  
47  
48 Canada. The study was conducted in English and this may have imposed some limitations  
49 on the findings as the participants may have felt more comfortable describing their  
50  
51  
52  
53  
54

1  
2  
3  
4  
5  
6  
7  
8  
9  
10 | perceived causes of depression in their own languages. The study also uses the term  
11 South Asian to identify a broad group of people with significant cultural, social and  
12 historical differences. It is of interest that despite this their narratives and the causes they  
13 thought were the main reasons for their depression were similar.  
14  
15  
16

17  
18  
19 We do not know how representative the results are. Indeed participants were selected  
20 from a community based mental health agency and this inevitably introduces an element  
21 of sampling bias. It may be that we selected people who had more severe depression, we  
22 may also have selected people who were more likely to accept mainstream help.  
23  
24 However, with regards to the last point it is worth pointing out that the service we used to  
25 identify participants is a community based agency which specifically offers help to  
26 racialised groups and is run by multi-cultural staff with a South Asian woman as the chief  
27 executive. The service is funded by Ontario but is not considered by many as mainstream.  
28  
29 Those who did not speak English were excluded and this may have skewed the  
30 demographic. Despite all of this the narratives from our participants made the authors feel  
31 compelled to share the data. This study offers an in depth and sometimes harrowing  
32 insight into the world of South Asian women in Toronto and the perceived causes of their  
33 depression. If these factors are the cause of depression for some in the community then  
34 decreasing their impact may be a possible avenue that could be further investigated for  
35 the development of health promotion or illness prevention targeted at this population.  
36  
37  
38  
39  
40  
41  
42  
43  
44  
45  
46  
47  
48  
49  
50  
51  
52  
53  
54

1  
2  
3  
4  
5  
6  
7  
8  
9  
10 This pilot study used a qualitative approach. It demonstrated that recruitment of South  
11 Asian women with depression is possible, that this group will discuss causation of  
12 depression and it has led to a model for the types of causes identified. It has been used to  
13 write a grant for a larger -scale mixed methods approach which would allow  
14  
15  
16  
17  
18 quantification of the rates of particular risk factors and their associations and interactions.

### 20 21 **Summary**

22 In summary, this study provides an insight to conceptual models of depression among the  
23 South Asian origin women in Toronto, Canada. Attributions of depression heavily  
24 consisted of individual, family, relationships, social, cultural or economic consequences  
25 rather than biological or spiritual causation. The findings of this study further enhance  
26 our understanding of the social determinants of mental health, and clearly show how  
27 individuals understand the combination of individual, family, social or environmental  
28 causation. Communities that perceive their illnesses as caused by social factors often  
29 prefer social remedies. ~~The results of this study may have implications for policy,~~  
30 ~~practice and education. For the communities who heavily rely on personal social cultural~~  
31 ~~models of depression, it may be more beneficial and effective to provide a combination~~  
32 ~~of psycho-social and biomedical treatments. Culturally appropriate support to mediate~~  
33 ~~domestic problems may be important in decreasing the rates and improving the outcomes~~  
34 ~~for SA women.~~

35  
36  
37  
38  
39  
40  
41  
42  
43  
44  
45  
46  
47 Understanding the perceived causes of depression in the South Asian origin population of  
48 Toronto may help in the development of culturally appropriate prevention strategies.  
49  
50  
51  
52  
53  
54

1  
2  
3  
4  
5  
6  
7  
8  
9  
10  
11  
12  
13  
14  
15  
16  
17  
18  
19  
20  
21  
22  
23  
24  
25  
26  
27  
28  
29  
30  
31  
32  
33  
34  
35  
36  
37  
38  
39  
40  
41  
42  
43  
44  
45  
46  
47  
48  
49  
50  
51  
52  
53  
54  
55  
56  
57  
58  
59  
60

### References

1. Karasz A, Garcia N, Ferri L. Conceptual models of depression in primary care patients: A comparative study. *J Cross Cult Psychol.* 2009; 40(6):1041-1059.
2. Kleinman A. *Patients and their healers in the context of culture.* Berkeley CA: University of California Press;1980.
3. Kleinman A. *The illness narratives: Suffering, healing and the human condition.* New York: Basi Books Inc. Publishers;1988.
4. Lloyd KR, Jacob KS, Patel V, et al. The development of the Short Explanatory Model Interview (SEMI) and its use among primary-care attender's with common mental disorders. *Psychol Med.*1998; 28:1231-1237.
5. Goldberg D, Huxley P. *Mental illness in the community: The pathway to psychiatric care.* London; Tavistock. 1980.
6. McCabe R, Priebe S. Explanatory models of illness in schizophrenia: comparison of four ethnic groups. *Br J Psychiatry.* 2004. 185:25-30.
7. Bhana K, Daniels CS. Generational changes in conceptions of mental illness: A study of a South African Indian sample. *Journal of Cross Cultural Psychology.* 1986;17:493-504.
8. Brown C, Dunbar-Jacob J, Palenchar DR, et al. Primary care patients' personal illness models for depression: A preliminary investigation. *Fam Pract.* 2001; 18(9):314-320.
9. Lackey GF. Feeling blue in Spanish: A qualitative inquiry of depression among Mexican immigrants. *Soc Sci Med.* 2008;67:228-237.



10. Sumathipala A, Hewege S, Hanwella R, et al. Randomized controlled trial of cognitive behaviour therapy for repeated consultations for medically unexplained complaints: A feasibility study in Sri Lanka. *Psychol Med.* 2000; 30(4):747-757.
11. Bhugra D, Mastrogianni A. Globalization and mental disorders. *Br J Psychiatry.* 2004;184:10-20.
12. Canadian Mental Health Association. Fast Facts: Mental Health/Mental Illness [cited 2011 Apr 8]. Available from: [http://www.cmha.ca/bins/content\\_page.asp?cid=6-20-23-43](http://www.cmha.ca/bins/content_page.asp?cid=6-20-23-43).
13. Health Canada. A proactive approach to good health. Report to the Auditor General of Canada, Chapter 9.[cited 2011 Jun 5]. Available from: [http://www.oag-bvg.gc.ca/internet/English/parl\\_oag\\_200112\\_09\\_e\\_11830.html\[on-line\]](http://www.oag-bvg.gc.ca/internet/English/parl_oag_200112_09_e_11830.html[on-line]).
14. Lai DWL, Surood S. Predictors of depression in aging South Asian Canadian. *J Cross Cult Gerontol.* 2008; 23:57-75.
15. Whitley R, Kirmayer LJ, and Groleau D. Understanding immigrants' reluctance to use mental health services: A qualitative study from Montreal. *Can J Psychiatry.* 2006;51(4):205-209.
16. Kirmayer LJ, Weinfeld M, Burgos G, et al. Use fo health care service for psychological distress by immigrants in and urban multicultural milieu. *Can J Psychiatry.* 2007;52(5):295-304.
17. Beiser M, Simich L, Pandalangat, N. Community in distress: mental health needs and help-seeking in the Tamil community in Toronto. *International Migration.* 2003;41(5):233-245.
18. Simich L, Hamilton H, Baya BK. Mental distress, economic hardship and expectations of life in Canada among Sudanese newcomers. *Transcult Psychiatry.* 2006;43(3):419-445.

19.

Nduna M, Jewkes RK. Silence: a strategy used to deal with psychological distress by young people in the Eastern Cape, South Africa. *Vulnerable Children and Youth Studies.* 2012. DOI: 10.1080/17450128.2011.643833.

1920. Hammarstrom A, Lehti A, Danielsson U, et al. Gender-related explanatory models of depression: A critical evaluation of medical articles. *Public Health.* 2009; 123:689-693.

Formatted: Tab stops: 0.13", Left

- 1  
2  
3  
4  
5  
6  
7  
8  
9  
10 | [2021](#). Goldstein B, Rosselli F. Etiological paradigms of depression: The relationship  
11 between perceived causes, empowerment, treatment preferences, and stigma.  
12 Journal of Mental Health. 2011;12(6):551-563.
- 13 | [2422](#). Schulberg HC, McClelland MA. Conceptual model for educating primary care  
14 providers in the diagnosis and treatment of depression. Gen Hosp Psychiatry.  
15 1987;9:1-10.
- 16  
17 | [2223](#). Campbell LC, Clauw DJ, Keefe FJ. Persistent pain and depression: A  
18 biopsychosocial perspective. Biol Psychiatry. 2003;54(3):399-409.
- 19  
20 | [2324](#). Karasz A. Cultural differences in conceptual models of depression. Soc Sci Med.  
21 2005;60(7):1625-1635.
- 22  
23 | [2425](#). Schreiber R, Hartrick GK. Keeping it together: How women use the biomedical  
24 explanatory model to manage the stigma of depression. Issues Mentl Health Nurs.  
25 2002;23:91-105.
- 26  
27 | [2526](#). Statistics Canada. Ethnic origin and visible minorities, Release no 72011. [cited  
28 2010 Dec 5]. Available from: [http://www12.statcan.gc.ca/census-  
30 recensement/2006/rt-td/eth-eng.cfm](http://www12.statcan.gc.ca/census-<br/>29 recensement/2006/rt-td/eth-eng.cfm).
- 31 | [2627](#). Tran K, Kaddatz J, Allard P. South Asians in Canada: Unity through diversity.  
32 Canadian Social Trends: Statistics Canada Catalogue. 2005.
- 33 | [2728](#). Hammarstrom A, Lehti A, Danielsson U, et al. Gender-related explanatory  
34 models of depression: A critical evaluation of medical articles. Public Health. 2009;  
35 123:689-693.
- 36  
37 | [2829](#). Kuehner C. Gender differences in unipolar depression: an update of  
38 epidemiological findings and possible explanations. Acta Psychiatr Scand.  
39 2003;108(3):163-174.
- 40  
41 | [2930](#). Creed F, Winterbottom M, Tomenson B, et al. Preliminary study of non-psychotic  
42 disorders in people from the Indian subcontinent living in UK and India. Acta  
43 Psychiatr Scand. 1999;99(4):257-260.
- 44 | [3031](#). Strauss AL and Corbin JM Basics of qualitative research; Techniques and  
45 procedures for developing grounded theory. London: Sage; 1998.
- 46  
47 | [3132](#). QSR International. NVivo qualitative data analysis software; QSR International  
48 Pty Ltd. Version 9. 2010.
- 49  
50  
51  
52  
53  
54  
55  
56  
57  
58  
59  
60

- 1  
2  
3  
4  
5  
6  
7  
8  
9  
10  
11  
12  
13  
14  
15  
16  
17  
18  
19  
20  
21  
22  
23  
24  
25  
26  
27  
28  
29  
30  
31  
32  
33  
34  
35  
36  
37  
38  
39  
40  
41  
42  
43  
44  
45  
46  
47  
48  
49  
50  
51  
52  
53  
54  
55  
56  
57  
58  
59  
60
3233. Bhui K, Bhugra D, Goldberg D. Causal explanations of distress and general practitioners' assessments of common mental disorder among Punjabi and English attendees. *Soc Psychiatry Psychiatr Epidemiol.* 2002;37:37-45.
3334. Patel V, Pereira J, Mann AH. Somatic and psychological models of common mental disorder in primary care in India. *Psychol Med.* 1998;28: 135-143.
3435. Ravi Shankar B, Saravanan B, Jacob KS. Explanatory models of common mental disorders among traditional healers and their patients in rural South India. *Int J Soc Psychiatry.* 2006;52(3):221-233.
3536. Sheikh S, Furnham A. A cross-cultural study of mental health beliefs and attitudes towards seeking professional help. *Soc Psychiatry Psychiatric Epidemiol.* 2000; 35:326-334.
37. — 37. Ahmad F, Shik A, Vanza R, et al. Voices of South Asian women: Immigration and mental health. *Women and Health.* 2004;40(4):113-130.
38. Holmes TH, Rahe RH. The Social Readjustment Rating Scale. *J Psychosom Res.* 1967;11:213-218.
39. Jacob KS, Bhugra D, Lloyd KR, et al. Common mental disorders, explanatory models and consultation behaviour among Indian women living in the UK. *J R Soc Med.* 1998;91:66-71.
40. Prince M, Harwood RH, Blizard RA, et al. Social support deficits, loneliness and life events as risk factors for depression in old age. The Gospel Oak Project VI. *Psychol Med.* 1997;27:323-332.
41. Weich S, Lewis G. Poverty, unemployment and common mental disorders: population based cohort study. *BMJ.* 1998;317:115-119.
42. Schulz A, Israel B, Williams D, et al. Social inequalities, stressors and self reported health status among African American and white women in the Detroit metropolitan area. *Soc Sci Med.* 2000;51:1639-1653.
43. Furnham A, Malik R. Cross-cultural beliefs about depression. *The International Journal of Social Psychiatry.* 1994;40(2):106-123.
44. Gask L, Aseem S, Waquas A, et al. Isolation, feeling 'stuck' and loss of control: Understanding persistence of depression in British Pakistani Women. *J Affect Disord.* 2011; 128:49-55.

- 1  
2  
3  
4  
5  
6  
7  
8  
9  
10  
11  
12  
13  
14  
15  
16  
17  
18  
19  
20  
21  
22  
23  
24  
25  
26  
27  
28  
29  
30  
31
45. [Morrison L, Guruge S, Snar KA. Sri Lankan Tamil immigrants in Toronto: Gender, marriage patterns and sexuality. In: Kelson G, Delaureat B, editors. Gender, Immigration, and Policy. New York: New York University Press; 1999. p 144-160.](#)
46. [Ahmad F, Driver N, McNally MJ, et al. "Why doesn't she seek help for partner abuse?" An exploratory study with South Asian immigrant women. Soc Sci Med. 2009;69:613-622.](#)
47. [Mason R, Hyman I, Berman H, et al. "Violence is an international language": Tamil women's perceptions of intimate partner violence. Violence Against Women. 2008; 14:1397-1412.](#)
48. [Shackelford TK, Buss DM, Bennett K. Forgiveness or breakup: Sex differences in responses to a partner's infidelity. Cognition and Emotion. 2002;16\(2\):299-307.](#)
49. [Huang W. An Asian perspective on relationship and marriage education. Family Process. 2005;44\(2\):161-173.](#)
50. [Hussain F, Cochrane R. Depression in South Asian women living in the UK: A review of the literature with implications for service provision. Transcult Psychiatry. 2004;41:253-270.](#)

32 **Table1: Thematic framework of the results**

33

| 1. Individual, family and relationship factors | Sub themes                                                                                                                                                                                                                                                                                                                                                                          |
|------------------------------------------------|-------------------------------------------------------------------------------------------------------------------------------------------------------------------------------------------------------------------------------------------------------------------------------------------------------------------------------------------------------------------------------------|
| Abuse                                          | <p><b>Financial/economic:</b> Controlling of income, forcing to work, stealing money, unauthorised use of credit cards, forcing to obtain loans.</p> <p><b>Psychological:</b> Humiliation, threatening to take custody of children, restricting personal contacts, forcing not to talk family and friends.</p> <p><b>Physical:</b> Beating, slapping, pulling hair and choking.</p> |
| Physical health problems                       | Multiple chronic illness, diabetes, high blood pressure, osteoporosis and fibromyalgia.                                                                                                                                                                                                                                                                                             |
| Bereavement                                    | Lack of family support, difficulty in attending counselling, no social support networks in the neighbourhood.                                                                                                                                                                                                                                                                       |
| Sexual infidelity                              | Social and emotional isolation.                                                                                                                                                                                                                                                                                                                                                     |
| Aging and isolation                            | Difficulties in living with children's families, isolation, extra work loads such as child caring for grandchildren.                                                                                                                                                                                                                                                                |
| <b>2. Culture and migration</b>                |                                                                                                                                                                                                                                                                                                                                                                                     |

34  
35  
36  
37  
38  
39  
40  
41  
42  
43  
44  
45  
46  
47  
48  
49  
50  
51  
52  
53  
54

|                                  |                                                                                                                                                                            |
|----------------------------------|----------------------------------------------------------------------------------------------------------------------------------------------------------------------------|
| Stress of divorce and separation | Negative response from family and community, cultural taboos on second marriage, loss of identity, fear and uncertainty of children.                                       |
| Cultural distance                | <b>Parents:</b> worry concerning westernizing of children, out of culture marriages.<br><b>Children:</b> restricted family environments, strict rules, arranged marriages. |
| Stigma                           | Labelling as a mentally ill, isolation from community                                                                                                                      |
| Difficulties in new country      | Loss of expectation, lack of understanding of systems, language difficulties.                                                                                              |
| <b>3. Socio-economic factors</b> |                                                                                                                                                                            |
| Economic difficulties            | Lack of income from government income support programs, loss of jobs                                                                                                       |
| Discrimination and racism        | Unfair treatments, racist acts, acts of hatred, discrimination for jobs                                                                                                    |

**Consolidated criteria for reporting qualitative research (COREQ): a 32- item checklist for interviews and focus groups**

**Allison Tong, Peter Sainsbury and Jonathan Craig.  
International Journal for Quality in Health Care, 2007. 19(6) 349-357**

| No Item                                        | Guide questions/description                                                                                                                                                                                                       |
|------------------------------------------------|-----------------------------------------------------------------------------------------------------------------------------------------------------------------------------------------------------------------------------------|
| <b>Domain 1: Research team and reflexivity</b> |                                                                                                                                                                                                                                   |
| Personal Characteristics                       |                                                                                                                                                                                                                                   |
| 1. Interviewer/facilitator                     | Which author/s conducted the interview of focus group<br>Samanthika Ekanayake page 9                                                                                                                                              |
| 2. Credentials                                 | What were the researcher's credentials? <i>E.g. PhD, MD</i><br>Samanthika Ekanayake, PhD<br>Farah Ahmad, PhD<br>Kwame McKenzie, MD page 1                                                                                         |
| 3. Occupation                                  | What was their occupation at the time of the study?<br>Samanthika Ekanayake- Post Doctoral Research Fellow<br>Farah Ahmad - Assistant Professor<br>Kwame McKenzie- Psychiatrist/ Professor page 1                                 |
| 4. Gender                                      | Was the researcher male or female?<br>Samanthika Ekanayake- Female page 9<br>Farah Ahmad – Female<br>Kwame McKenzie- Male                                                                                                         |
| 5. Experience and training                     | What experience or training did the researcher have?<br><br>All three researchers have post doctoral training in qualitative research and have published qualitative papers in peer reviewed journals. Page 10                    |
| Relationship with participants                 |                                                                                                                                                                                                                                   |
| 6. Relationship established                    | Was a relationship established prior to study commencement?<br><br>Participants were referred to the study by community mental health case workers or by answering an advertisement in the community mental health agency. Page 8 |
| 7. Participant knowledge of the interviewer    | What did the participants know about the researcher? <i>e.g. personal goals, reasons for doing the research</i>                                                                                                                   |

|                                          |                                                                                                                                                                                                                                                                      |
|------------------------------------------|----------------------------------------------------------------------------------------------------------------------------------------------------------------------------------------------------------------------------------------------------------------------|
|                                          | Participants were informed about researcher' ethnic background, occupation and credentials. Also a description of purpose of the research was given with the study information materials. Page 8-9                                                                   |
| 8. Interviewer characteristics           | <p>What characteristics were reported about the interviewer/facilitator? <i>e.g. Bias, assumptions, reasons and interests in the research topic</i></p> <p>The Interviewer is a South Asian immigrant, woman page 9</p>                                              |
| <b>Domain 2: study design</b>            |                                                                                                                                                                                                                                                                      |
| Theoretical framework                    |                                                                                                                                                                                                                                                                      |
| 9. Methodological orientation and theory | <p>What methodological orientation was stated to underpin the study? <i>e.g. grounded theory, discourse analysis, ethnography, phenomenology, content analysis</i></p> <p>Thematic content analysis with some elements of grounded theory page 10</p>                |
| Participant selection                    |                                                                                                                                                                                                                                                                      |
| 10. Sampling                             | <p>How were participants selected? <i>e.g. purposive, convenience, consecutive, snowball</i></p> <p>Purposive page 9</p>                                                                                                                                             |
| 11. Method of approach                   | <p>How were participants approached? <i>e.g. face-to-face, telephone, mail, email</i></p> <p>Participants were referred by case workers or answered and advertisement place at a community mental health centre, they were then approached face to face page 8-9</p> |
| 12. Sample size                          | <p>How many participants were in the study?</p> <p>There were 10 participants – page 11</p>                                                                                                                                                                          |
| 13. Non-participation                    | <p>How many people refused to participate or dropped out? Reasons?</p> <p>There were no dropouts – page 11</p>                                                                                                                                                       |
| Setting                                  |                                                                                                                                                                                                                                                                      |
| 14. Setting of data collection           | <p>Where was the data collected? <i>e.g. home, clinic, workplace</i></p> <p>Participants were interviewed at the community mental health agency offices. Page 9</p>                                                                                                  |
| 15. Presence of non-participants         | Was anyone else present besides the participants and researchers?                                                                                                                                                                                                    |

|                            |                                                                                                                                                                                                                                                                                                                                                                                                                                                                                                                                                                                                                                                                                                                                                                                                                                              |
|----------------------------|----------------------------------------------------------------------------------------------------------------------------------------------------------------------------------------------------------------------------------------------------------------------------------------------------------------------------------------------------------------------------------------------------------------------------------------------------------------------------------------------------------------------------------------------------------------------------------------------------------------------------------------------------------------------------------------------------------------------------------------------------------------------------------------------------------------------------------------------|
|                            | Participants were interviewed alone. Page 9                                                                                                                                                                                                                                                                                                                                                                                                                                                                                                                                                                                                                                                                                                                                                                                                  |
| 16. Description of sample  | <p>What are the important characteristics of the sample? <i>e.g. demographic data, date</i></p> <p>Participants were aged between 22-65 years of age. Seven women were born in India, two in Sri Lanka and one in Pakistan. Four women were Muslim, three Hindu and three Catholic. Two participants had university degrees, one had a high school diploma and all the other participants (7) had completed less than a high school education. None of the women were employed, and all were dependent on some form of income support from the government such as Ontario Disability Support Program (ODSP), Employment Insurance (EI), or the Old Age Security (OAS) program. Eight women were married, one was unmarried and the other was a widow. Two of the women had some history of mental illness other than depression. Page 11</p> |
| Data collection            |                                                                                                                                                                                                                                                                                                                                                                                                                                                                                                                                                                                                                                                                                                                                                                                                                                              |
| 17. Interview guide        | <p>Were questions, prompts, guides provided by the authors?<br/>Was it pilot tested?<br/>A topic guide was used to direct the flow of the interviews. Page 9<br/>The study was a pilot.</p>                                                                                                                                                                                                                                                                                                                                                                                                                                                                                                                                                                                                                                                  |
| 18. Repeat interviews      | <p>Were repeat interviews carried out? If yes, how many?</p> <p>No</p>                                                                                                                                                                                                                                                                                                                                                                                                                                                                                                                                                                                                                                                                                                                                                                       |
| 19. Audio/visual recording | <p>Did the research use audio or visual recording to collect the data?</p> <p>Interviews were taped and transcribed. Page 9</p>                                                                                                                                                                                                                                                                                                                                                                                                                                                                                                                                                                                                                                                                                                              |
| 20. Field notes            | <p>Were field notes made during and/or after the interview or focus group?</p> <p>Field notes were made during the interview. Page 10.<br/>They were not included in this data analysis</p>                                                                                                                                                                                                                                                                                                                                                                                                                                                                                                                                                                                                                                                  |
| 21. Duration               | <p>What was the duration of the interviews or focus group?</p> <p>Interviews lasted 45-60 minutes page 9</p>                                                                                                                                                                                                                                                                                                                                                                                                                                                                                                                                                                                                                                                                                                                                 |
| 22. Data saturation        | <p>Was data saturation discussed?</p> <p>Recruitment was stopped when no new themes emerged. page 11.</p>                                                                                                                                                                                                                                                                                                                                                                                                                                                                                                                                                                                                                                                                                                                                    |



|                                                             |                                                                                                                                                                                                                     |
|-------------------------------------------------------------|---------------------------------------------------------------------------------------------------------------------------------------------------------------------------------------------------------------------|
| 23. Transcripts returned                                    | <p>Were transcripts returned to participants for comment and/or correction?</p> <p>Transcripts were not returned to the participants.</p>                                                                           |
| <p>Domain 3: analysis and findings</p> <p>Data analysis</p> |                                                                                                                                                                                                                     |
| 24. Number of data coders                                   | <p>How many data coders coded the data?</p> <p>All three authors involved in coding. Coding separately conducted by Samantha Ekanayake and Kwame McKenzie and then it discussed with the research team. Page 10</p> |
| 25. Description of the coding tree                          | <p>Did authors provide a description of the coding tree?</p> <p>Table 1 presents the thematic framework of the themes.</p>                                                                                          |
| 26. Derivation of themes                                    | <p>Were themes identified in advance or derived from the data?</p> <p>Themes were identified from the data. Page 10</p>                                                                                             |
| 27. Software                                                | <p>What software, if applicable, was used to manage the data?</p> <p>NVivo9, qualitative data analysis software. Page 10</p>                                                                                        |
| 28. Participant checking                                    | <p>Did participants provide feedback on the findings?</p> <p>Subsequent to writing the paper results were presented to some of the participants. But formal participant checking was not undertaken.</p>            |
| Reporting                                                   |                                                                                                                                                                                                                     |
| 29. Quotations presented                                    | <p>Were participant quotations presented to illustrate the themes / findings? Was each quotation identified? <i>e.g. participant number</i></p> <p>Yes. Results section pages 12-19</p>                             |
| 30. Data and findings consistent                            | <p>Was there consistency between the data presented and the findings?</p> <p>We believe there is consistency between the presented data and the findings.</p>                                                       |
| 31. Clarity of major themes                                 | <p>Were major themes clearly presented in the findings?</p> <p>We have presented three major themes. : family and</p>                                                                                               |

|                             |                                                                                                                                                                                                                                                                                                                                                                                                                                                                                                                               |
|-----------------------------|-------------------------------------------------------------------------------------------------------------------------------------------------------------------------------------------------------------------------------------------------------------------------------------------------------------------------------------------------------------------------------------------------------------------------------------------------------------------------------------------------------------------------------|
|                             | relationships; culture and migration; and, socio-economic<br>Page 11                                                                                                                                                                                                                                                                                                                                                                                                                                                          |
| 32. Clarity of minor themes | <p>Is there a description of diverse cases or discussion of minor themes?</p> <p>Within the major themes we have discussed as separate subheadings minor themes. Page 12-19 and in our thematic framework.</p> <p>Individual and family (abuse, physical health, bereavement. Sexual infidelity, aging and isolation)<br/>Culture and migration (stress divorce and separation, cultural distance, stigma, difficulties in the new country)<br/>Socio-economic factors (economic difficulties, discrimination and racism)</p> |
